# Supplementary material for: Using host species traits to understand the Wolbachia infection distribution across terrestrial beetles
Source: PubMed Central journal article supplement (PMC6351630; doi:10.1038/s41598-018-38155-5), 2019-01-29
Supplement: 41598_2018_38155_MOESM1_ESM.pdf [file 41598_2018_38155_MOESM1_ESM.pdf]

Supplementary tables, figures and files to the article:

**Using host species traits to understand the *Wolbachia*  
infection distribution across terrestrial beetles**

Łukasz Kajtoch, Michał Kolasa, Daniel Kubisz, Jerzy M.Gutowski, Radosław Ścibior,  
Miłosz A. Mazur, Milada Holecová

SCIENTIFIC REPORTS

DOI:10.1038/s41598-018-38155-5

Supplementary Table S1. Summary of *Wolbachia* infection status with respect to taxonomy of examined beetle hosts (A) and with respect to ecological and biological traits of examined beetle hosts (B).

|                  |              | A – taxonomy |              |             |             |               |               |               |               |               |               |                |           |              |                |              |             |               |                |                |              |                 |               |              |                 |                |           |              |             |
|------------------|--------------|--------------|--------------|-------------|-------------|---------------|---------------|---------------|---------------|---------------|---------------|----------------|-----------|--------------|----------------|--------------|-------------|---------------|----------------|----------------|--------------|-----------------|---------------|--------------|-----------------|----------------|-----------|--------------|-------------|
| group            | family       |              |              |             |             |               |               |               |               |               |               |                |           |              |                |              |             |               |                |                |              |                 |               |              |                 |                |           |              |             |
| taxonomic units  | Anthicidae   | Apionidae    | Bostrichidae | Buprestidae | Cantharidae | Carabidae     | Cerambycidae  | Chrysomelidae | Cleridae      | Coccinellidae | Curculionidae | Dascillidae    | Dasytidae | Dermeestidae | Elateridae     | Erotylidae   | Geotrupidae | Lucanidae     | Lycidae        | Melandryidae   | Mordellidae  | Mycetophagidae  | Nitidulidae   | Oedemeridae  | Omalisidae      | Pyrochroidae   | Pythidae  | Rhynchitidae | Salpingidae |
| species infected | 2            | 15           | 1            | 6           | 8           | 47            | 38            | 39            | 3             | 16            | 31            | 1              | 2         | 2            | 4              | 6            | 2           | 1             | 1              | 1              | 2            | 5               | 1             | 3            | 1               | 2              | 1         | 3            | 1           |
| A                | 1            | 7            | 0            | 1           | 0           | 9             | 6             | 10            | 0             | 3             | 20            | 0              | 0         | 0            | 0              | 3            | 0           | 0             | 0              | 0              | 0            | 0               | 0             | 0            | 0               | 0              | 0         | 1            | 0           |
| B                | 0            | 0            | 0            | 1           | 0           | 4             | 5             | 7             | 0             | 3             | 10            | 0              | 0         | 0            | 0              | 2            | 0           | 0             | 0              | 0              | 0            | 0               | 0             | 0            | 0               | 0              | 0         | 0            | 0           |
| AB               | 0            | 3            | 0            | 0           | 0           | 3             | 0             | 1             | 0             | 0             | 5             | 0              | 0         | 0            | 0              | 1            | 0           | 0             | 0              | 0              | 0            | 0               | 0             | 0            | 0               | 0              | 0         | 1            | 0           |
| AB               | 1            | 4            | 0            | 0           | 0           | 2             | 1             | 2             | 0             | 0             | 5             | 0              | 0         | 0            | 0              | 0            | 0           | 0             | 0              | 0              | 0            | 0               | 0             | 0            | 0               | 0              | 0         | 0            | 0           |
| group            | family       |              |              |             |             |               |               |               | superfamily   |               |               |                |           |              |                |              | infraorder  |               |                |                |              | suborder        |               |              |                 |                |           |              |             |
| taxonomic units  | Scarabaeidae | Scraptiidae  | Silphidae    | Silvanidae  | Sphindidae  | Staphylinidae | Tenebrionidae | Zopheridae    | Bostrichoidea | Buprestoidea  | Caraboidea    | Chrysomeloidea | Cleroidea | Cucujoidea   | Curculionoidea | Dascilloidea | Elateroidea | Scarabaeoidea | Staphylinoidea | Tenebrionoidea | Cucujiformia | Bostrichiformia | Elateriformia | Carabiformia | Scarabaeiformia | Staphylinoidea | Polyphaga | Adephaga     |             |
| species infected | 28           | 2            | 4            | 1           | 1           | 8             | 7             | 1             | 3             | 6             | 47            | 78             | 5         | 24           | 49             | 1            | 14          | 31            | 13             | 26             | 182          | 3               | 21            | 47           | 31              | 13             | 250       | 47           |             |
| A                | 7            | 2            | 2            | 1           | 0           | 5             | 3             | 0             | 0             | 1             | 9             | 16             | 0         | 6            | 29             | 0            | 7           | 7             | 6              | 57             | 0            | 1               | 9             | 7            | 7               | 72             | 9         |              |             |
| B                | 4            | 2            | 2            | 1           | 0           | 4             | 3             | 0             | 0             | 1             | 4             | 12             | 0         | 5            | 11             | 0            | 4           | 6             | 5              | 33             | 0            | 1               | 4             | 4            | 6               | 44             | 4         |              |             |
| AB               | 3            | 0            | 0            | 0           | 0           | 0             | 0             | 0             | 0             | 0             | 3             | 1              | 0         | 1            | 9              | 0            | 3           | 0             | 0              | 11             | 0            | 0               | 3             | 3            | 0               | 14             | 3         |              |             |
| AB               | 0            | 0            | 0            | 0           | 0           | 1             | 0             | 0             | 0             | 0             | 2             | 3              | 0         | 0            | 9              | 0            | 0           | 1             | 1              | 13             | 0            | 0               | 2             | 0            | 1               | 14             | 2         |              |             |

| B – ecological/biological traits |               |               |           |              |                   |                     |                    |            |               |         |              |              |               |              |                   |             |               |             |           |            |                     |      |              |                 |           |       |        |          |        |           |
|----------------------------------|---------------|---------------|-----------|--------------|-------------------|---------------------|--------------------|------------|---------------|---------|--------------|--------------|---------------|--------------|-------------------|-------------|---------------|-------------|-----------|------------|---------------------|------|--------------|-----------------|-----------|-------|--------|----------|--------|-----------|
| traits                           | trophic guild |               |           |              |                   | habitat preferences |                    |            | microhabitats |         |              |              |               |              | distribution      |             |               |             | range     |            | thermal preferences |      | reproduction |                 | body size |       |        | mobility |        |           |
| states                           | phytophagous  | mycetophagous | predators | saprophagous | cambioxylophagous | forest-dwellers     | open land-dwellers | ubiquitous | coprophilous  | epigeic | herbophilous | hygrophilous | mycetophilous | necrophilous | cambioxylophilous | continental | mediterranean | mountainous | temperate | widespread | fragmented          | warm | neutral      | parthenogenetic | sexual    | large | medium | small    | mobile | sedentary |
| species                          | 101           | 17            | 91        | 35           | 53                | 112                 | 131                | 54         | 20            | 38      | 128          | 25           | 15            | 5            | 66                | 25          | 17            | 11          | 244       | 251        | 46                  | 35   | 262          | 5               | 292       | 23    | 174    | 100      | 274    | 23        |
| infected                         | 39            | 4             | 16        | 12           | 10                | 26                  | 43                 | 12         | 7             | 5       | 43           | 9            | 4             | 2            | 11                | 8           | 2             | 3           | 68        | 68         | 13                  | 11   | 70           | 4               | 77        | 3     | 38     | 40       | 71     | 10        |
| A                                | 18            | 3             | 10        | 8            | 9                 | 21                  | 21                 | 6          | 4             | 4       | 21           | 4            | 3             | 2            | 10                | 4           | 1             | 1           | 42        | 39         | 9                   | 6    | 42           | 2               | 46        | 1     | 26     | 21       | 42     | 6         |
| B                                | 10            | 1             | 3         | 3            | 0                 | 3                   | 13                 | 1          | 3             | 1       | 10           | 2            | 1             | 0            | 0                 | 1           | 1             | 0           | 15        | 15         | 2                   | 1    | 16           | 1               | 16        | 1     | 5      | 11       | 14     | 3         |
| AB                               | 11            | 0             | 3         | 1            | 1                 | 2                   | 9                  | 5          | 0             | 0       | 12           | 3            | 0             | 0            | 1                 | 3           | 0             | 2           | 11        | 14         | 2                   | 4    | 12           | 1               | 15        | 1     | 7      | 8        | 15     | 1         |

Supplementary Table S2. Basic statistics describing intra- and inter-group genetic distances calculated for *Wolbachia* strains found in superfamilies and trophic guilds of examined beetles.

| variable       | N  | Average | Min | Max  | SD  |
|----------------|----|---------|-----|------|-----|
| superfamilies  |    |         |     |      |     |
| intra          | 7  | 9.6     | 5.7 | 16.1 | 3.8 |
| inter          | 21 | 11.6    | 7.3 | 16.1 | 2.5 |
| trophic guilds |    |         |     |      |     |
| intra          | 5  | 9.3     | 6.5 | 11.4 | 2.4 |
| inter          | 10 | 10.5    | 8.3 | 13.0 | 1.4 |

Supplementary Table S3. Sums of Akaike Information Criterion weights obtained from Generalized Linear Models (presented in Table 5) for selected predictors explaining either infection status of examined beetle hosts (*Wolbachia* infected vs uninfected) or infection by two supergroups (A vs B).

| Variable          | infected vs uninfected | supergroups A vs B |
|-------------------|------------------------|--------------------|
| Distance          | <b>0.530</b>           | <b>0.548</b>       |
| Trophism          | <b>0.511</b>           | 0.319              |
| Range/Climate     | 0.420                  | 0.309              |
| Habitat           | 0.404                  | <b>0.506</b>       |
| Body              | 0.460                  | 0.305              |
| Reproduction mode | <b>0.571</b>           | 0.276              |
| Mobility          | 0.435                  | 0.313              |

Supplementary Table S4. Characteristics of sampling of beetle species for Wolbachia screening with accession numbers to GenBank (cox1 - cytochrome oxidase subunit I gene generated from beetle DNA and Wolbachia housekeeping genes: wsp - Wolbachia surface protein, gatB - aspartylglutamyl-tRNA(Gln) amidotransferase, subunit B; coxA - cytochrome c oxidase, subunit I; hcpA - conserved hypothetical protein; fsz - cell division protein, and fructose-bisphosphate aldolase). Italicized cox1 numbers downloaded from GenBank from other studies (italicized and underlined – single sequences of congeneric taxa for species which missed cox1, used for distances calculation). Distribution of sampling sites is presented on supplementary file 1.

| Species                              | Country  | Locality          | Year | Voucher | cox1            | wsp      | gatB     | coxA     | hcpA     | fbpA     | fsz      |
|--------------------------------------|----------|-------------------|------|---------|-----------------|----------|----------|----------|----------|----------|----------|
| <i>Abax parralelepipedus</i>         | Poland   | Chełm             | 2015 | W00218a | MH020426        |          |          |          |          |          |          |
| <i>Abax parralelepipedus</i>         | Poland   | Chełm             | 2015 | W00218b | MH020427        |          |          |          |          |          |          |
| <i>Abax parralelelus</i>             | Poland   | Szyk              | 2014 | W00232a | MH020429        | MG987893 | MG987944 | MG987643 | MG987739 | MG987691 | MG987977 |
| <i>Adalia bipunctata</i>             | Poland   | Białowieża Forest | 2016 | W00131a | MH115505        |          |          |          |          |          |          |
| <i>Adalia bipunctata</i>             | Poland   | Koryciny          | 2015 | W00131b | MH115506        |          |          |          |          |          |          |
| <i>Agapanthia villosoviridescens</i> | Poland   | Białowieża Forest | 2016 | W00055a | <i>KU919520</i> |          |          |          |          |          |          |
| <i>Agapanthia villosoviridescens</i> | Poland   | Białowieża Forest | 2016 | W00055b | +               |          |          |          |          |          |          |
| <i>Agapanthia villosoviridescens</i> | Poland   | Białowieża Forest | 2016 | W00055c |                 |          |          |          |          |          |          |
| <i>Agonum marginatum</i>             | Slovakia | Andrejovka        | 2017 | W00211a | MH020395        |          |          |          |          |          |          |
| <i>Agonum marginatum</i>             | Poland   | Lipnica Wielka    | 2017 | W00211b |                 | MG987900 |          |          | MG987723 |          |          |
| <i>Agonum marginatum</i>             | Poland   | Tolkarnicko       | 2017 | W00211c |                 |          |          |          |          |          |          |
| <i>Agrilus derasofasciatus</i>       | Poland   | Białowieża Forest | 2016 | W00234a | MH115496        |          |          |          |          |          |          |
| <i>Agrilus suvorovi</i>              | Poland   | Białowieża Forest | 2016 | W00075a | MH115551        |          |          |          |          |          |          |
| <i>Agrilus suvorovi</i>              | Poland   | Borowiec Radom    | 2016 | W00075b |                 |          |          |          |          |          |          |
| <i>Agrypnus murinus</i>              | Poland   | Białowieża Forest | 2016 | W00244a | MH115536        |          |          |          |          |          |          |
| <i>Alosterna tabacicolor</i>         | Poland   | Rogalin           | 2016 | W00081a | MH020351        |          |          |          |          |          |          |
| <i>Alosterna tabacicolor</i>         | Poland   | Białowieża Forest | 2016 | W00081b |                 |          |          |          |          |          |          |
| <i>Alosterna tabacicolor</i>         | Poland   | Grzybowa          | 2017 | W00081c | MH020352        |          |          |          |          |          |          |
| <i>Altica oleracea</i>               | Bulgaria | Anevo             | 2015 | W00018a | MH020485        |          |          |          |          | +        |          |
| <i>Altica oleracea</i>               | Bulgaria | Pawel Banja       | 2015 | W00018b | MH020486        |          |          |          |          |          |          |
| <i>Altica oleracea</i>               | Bulgaria | Karlovo           | 2015 | W00018c | MH020487        |          |          |          |          |          |          |
| <i>Amara similata</i>                | Poland   | Chełm             | 2015 | W00227a | MH020396        | MG987834 | MG987946 | MG987641 | MG987749 | MG987699 | MG987979 |
| <i>Amphimallon solstitialis</i>      | Poland   | Kędzierzyn-Koźle  | 2017 | W00065a | MH020490        |          |          |          |          |          |          |
| <i>Amphimallon solstitialis</i>      | Poland   | Suchy Bór         | 2017 | W00065b | MH020491        |          |          |          |          |          |          |
| <i>Anaspis brunnipes</i>             | Poland   | Szymiszów         | 2017 | W00167a | MH020278        | MG987889 |          |          | +        |          |          |
| <i>Anaspis brunnipes</i>             | Poland   | Szymiszów         | 2017 | W00167b | MH020280        | MG987890 |          |          |          |          |          |
| <i>Anaspis brunnipes</i>             | Poland   | Szymiszów         | 2017 | W00167c | MH020279        |          |          |          |          |          |          |
| <i>Anaspis frontalis</i>             | Poland   | Kędzierzyn-Koźle  | 2017 | W00166a | MH020275        | MG987880 |          |          | +        |          |          |
| <i>Anaspis frontalis</i>             | Poland   | Kędzierzyn-Koźle  | 2017 | W00166b | MH020276        |          |          |          |          |          |          |
| <i>Anaspis frontalis</i>             | Poland   | Kędzierzyn-Koźle  | 2017 | W00166c | MH020277        | MG987881 |          |          | +        |          |          |
| <i>Anaspis frontalis</i>             | Poland   | Dursztyn          | 2014 | W00166d | MG987882        |          |          |          | +        |          |          |
| <i>Anastrangalia reyi</i>            | Poland   | Białowieża Forest | 2016 | W00261a | MH020347        | MG987848 | MG987955 | MG987634 | +        | +        | MG988052 |
| <i>Anastrangalia reyi</i>            | Poland   | Białowieża Forest | 2016 | W00261b | MH020348        | MG987849 | MG987956 | MG987646 |          | +        | +        |
| <i>Anastrangalia sanguinolenta</i>   | Poland   | Białowieża Forest | 2016 | W00262a | MH020349        |          |          |          |          |          |          |
| <i>Anastrangalia sanguinolenta</i>   | Poland   | Białowieża Forest | 2016 | W00262b | MH020350        |          |          |          |          |          |          |
| <i>Anatis ocellata</i>               | Poland   | Porytowe Wzgórze  | 2015 | W00225a | MH020519        |          |          |          |          |          |          |
| <i>Anomala dubia</i>                 | Poland   | Knyszyn Forest    | 2016 | W00062a | MH115533        |          |          |          |          |          |          |
| <i>Anomala dubia</i>                 | Poland   | Białowieża Forest | 2016 | W00062b | +               |          |          |          |          |          |          |
| <i>Anomala dubia</i>                 | Poland   | Lysaków           | 2016 | W00062c | +               |          |          |          |          |          |          |
| <i>Anoplodera sexguttata</i>         | Poland   | Białowieża Forest | 2016 | W00082a | MH020345        |          |          |          |          |          |          |
| <i>Anoplodera sexguttata</i>         | Poland   | Poznachowice      | 2017 | W00082b | MH020346        |          |          |          |          |          |          |
| <i>Anoplodera sexguttata</i>         | Poland   | Kepie             | 2017 | W00082c |                 |          |          |          |          |          |          |
| <i>Anoplotrupes stercorosus</i>      | Poland   | Grajów            | 2017 | W00067a | MH020522        |          |          |          |          |          |          |
| <i>Anoplotrupes stercorosus</i>      | Bulgaria | Troian            | 2015 | W00067b | MH020523        |          |          |          |          |          |          |
| <i>Anoplotrupes stercorosus</i>      | Poland   | Białowieża Forest | 2014 | W00067d | MH020524        |          |          |          |          |          |          |
| <i>Anostirus castaneus</i>           | Poland   | Białowieża Forest | 2014 | W00138a | MH115530        |          |          |          |          |          |          |
| <i>Anostirus castaneus</i>           | Poland   | Lapsze Niżne      | 2014 | W00138b | +               |          |          |          |          |          |          |
| <i>Anthaxia nitidula</i>             | Poland   | Sromowce Niżne    | 2014 | W00073a | MH115561        |          |          |          |          |          |          |
| <i>Anthaxia nitidula</i>             | Austria  | Porrau            | 2015 | W00073b | +               |          |          |          |          |          |          |
| <i>Anthaxia nitidula</i>             | Poland   | Grzybowa          | 2016 | W00073c | +               |          |          |          |          |          |          |
| <i>Anthaxia quadripunctata</i>       | Poland   | Chrusty           | 2015 | W00074a | <i>KM452657</i> |          |          |          |          |          |          |
| <i>Anthaxia quadripunctata</i>       | Poland   | Białowieża Forest | 2014 | W00074b |                 |          |          |          |          |          |          |
| <i>Anthonomus rubi</i>               | Ukraine  | Zvenyhorod        | 2010 | W00016a | MH020261        | MG987847 | MG987937 | +        | MG987761 | MG987704 | MG988013 |
| <i>Anthonomus rubi</i>               | Hungary  | Lénárdaróc        | 2012 | W00016b | +               |          |          |          |          |          |          |
| <i>Anthonomus rubi</i>               | Poland   | Ślesin            | 2010 | W00016c | +               |          |          |          | MG987770 |          | MG987983 |
| <i>Aphodius ater</i>                 | Romania  | Fenes             | 2016 | W00122a | MH020313        | MG987780 |          |          |          |          | MG988043 |
| <i>Aphodius ater</i>                 | Poland   | Lipnica Wielka    | 2017 | W00122b | MH020314        | MG987781 |          |          |          |          | MG988044 |
| <i>Aphodius depressus</i>            | Romania  | Fenes             | 2016 | W00084a | MH020525        |          |          |          |          |          |          |
| <i>Aphodius depressus</i>            | Romania  | Fenes             | 2016 | W00084b | MH020526        |          |          |          |          |          |          |
| <i>Aphodius depressus</i>            | Poland   | Wielopole         | 2015 | W00084c | MH020527        |          |          |          |          |          |          |
| <i>Aphodius depressus</i>            | Bulgaria | Troian            | 2015 | W00084d | +               |          |          |          |          |          |          |
| <i>Aphodius depressus</i>            | Bulgaria | Troian            | 2015 | W00084e | +               |          |          |          |          |          |          |
| <i>Aphodius erraticus</i>            | Poland   | Wielopole         | 2015 | W00123a | +               |          |          |          |          |          |          |
| <i>Aphodius erraticus</i>            | Romania  | Islaz             | 2016 | W00123b |                 |          |          |          |          |          |          |
| <i>Aphodius erraticus</i>            | Poland   | Wielopole         | 2015 | W00123c |                 |          |          |          |          |          |          |
| <i>Aphodius fossor</i>               | Bulgaria | Balkanec          | 2015 | W00124a | MH020305        |          |          |          |          |          |          |
| <i>Aphodius fossor</i>               | Poland   | Wielopole         | 2015 | W00124b | MH020306        |          |          |          |          |          |          |
| <i>Aphodius granarius</i>            | Bulgaria | Kalofer           | 2015 | W00118a |                 | +        |          |          |          |          | MG988014 |
| <i>Aphodius granarius</i>            | Romania  | Fenes             | 2016 | W00118b | MH020315        | +        |          |          |          |          | MG988040 |
| <i>Aphodius granarius</i>            | Bulgaria | Kalofer           | 2015 | W00118c |                 | +        |          |          |          |          | MG988041 |
| <i>Aphodius haemorrhoidalis</i>      | Poland   | Sromowce Niżne    | 2014 | W00119a | MH020316        | MG987859 |          |          |          |          |          |
| <i>Aphodius haemorrhoidalis</i>      | Poland   | Wielopole         | 2015 | W00119b |                 | MG987860 |          |          |          |          |          |
| <i>Aphodius haemorrhoidalis</i>      | Poland   | Niebrzegów        | 2015 | W00119c |                 | MG987861 |          |          |          |          |          |
| <i>Aphodius luridus</i>              | Romania  | Fenes             | 2016 | W00120a | MH115495        |          |          |          |          |          |          |
| <i>Aphodius luridus</i>              | Poland   | Sromowce Niżne    | 2014 | W00120b | +               |          |          |          |          |          |          |
| <i>Aphodius luridus</i>              | Poland   | Wielopole         | 2015 | W00120c |                 |          |          |          |          |          |          |
| <i>Aphodius pedellus</i>             | Bulgaria | Troian            | 2015 | W00090a | MH020528        |          |          |          |          |          |          |
| <i>Aphodius pedellus</i>             | Poland   | Wielopole         | 2015 | W00090b | MH020529        |          |          |          |          |          |          |
| <i>Aphodius pedellus</i>             | Poland   | Niebrzegów        | 2015 | W00090c | MH020530        |          |          |          |          |          |          |
| <i>Aphodius pusillus</i>             | Romania  | Fenes             | 2016 | W00087a | MH020307        |          |          |          |          |          |          |
| <i>Aphodius pusillus</i>             | Poland   | Sromowce Niżne    | 2014 | W00087c |                 |          |          |          |          |          |          |
| <i>Aphodius pusillus</i>             | Bulgaria | Kalofer           | 2015 | W00087b |                 |          |          |          |          |          |          |
| <i>Aphodius scrutator</i>            | Bulgaria | Kalofer           | 2015 | W00125a | MH020364        |          |          |          |          |          |          |
| <i>Aphodius scrutator</i>            | Romania  | Tanacu            | 2016 | W00125b | MH020365        |          |          |          |          |          |          |
| <i>Aphodius sphaecelatus</i>         | Bulgaria | Troian            | 2015 | W00089b | MH020308        |          |          |          |          |          |          |
| <i>Aphodius sphaecelatus</i>         | Bulgaria | Balkanec          | 2015 | W00089d |                 |          |          |          |          |          |          |
| <i>Aphodius sphaecelatus</i>         | Poland   | Lipnica Wielka    | 2015 | W00089g |                 |          |          |          |          |          |          |

|                                    |          |                        |      |         |                 |          |          |          |          |          |          |
|------------------------------------|----------|------------------------|------|---------|-----------------|----------|----------|----------|----------|----------|----------|
| <i>Aphodius sticticus</i>          | Bulgaria | Kalofer                | 2015 | W00126a | MH020310        | MG987862 | MG987911 |          | MG987721 | MG987675 | MG988033 |
| <i>Aphodius sticticus</i>          | Bulgaria | Rocafer                | 2015 | W00126b | MH020311        | MG987863 | MG987912 | MG987660 | MG987722 | MG987676 | MG988032 |
| <i>Aphodius sticticus</i>          | Romania  | Fenes                  | 2016 | W00126c | MH020312        |          |          |          |          |          |          |
| <i>Aphthona venustula</i>          | Poland   | Trzebinia-Bożniowa Mt. | 2015 | W00035a | MH020465        | MG987870 | MG987918 |          | MG987731 | MG987677 | MG988042 |
| <i>Aphthona venustula</i>          | Bulgaria | Balkanec               | 2015 | W00035b |                 |          |          |          |          |          |          |
| <i>Aphthona venustula</i>          | Bulgaria | Karvare                | 2015 | W00035c |                 | MG987871 | MG987919 | MG987659 | MG987732 | MG987678 | MG988031 |
| <i>Arhopalus rusticus</i>          | Poland   | Odolion ad Ciechocinek | 2016 | W00273a | MH020361        | MG987891 |          | MG987637 | MG987740 | +        | MG987982 |
| <i>Arhopalus rusticus</i>          | Poland   | Białowieża Forest      | 2014 | W00273b | MH020362        | +        |          | MG987636 |          | +        |          |
| <i>Aromia moschata</i>             | Poland   | Borowa                 | 2015 | W00224a | MH020476        |          |          |          |          |          |          |
| <i>Athous subfuscus</i>            | Poland   | Białowieża Forest      | 2014 | W00280a | MH115535        |          |          |          |          |          |          |
| <i>Attagenus pellio</i>            | Poland   | Białowieża Forest      | 2014 | W00279a | MH115500        |          |          |          |          |          |          |
| <i>Batophila rubi</i>              | Poland   | Wdżar Mt.              | 2014 | W00036a | MH115564        | MG987841 | +        |          | +        | +        | +        |
| <i>Batophila rubi</i>              | Poland   | Dursztyn               | 2014 | W00036b |                 | MG987842 |          |          | +        |          |          |
| <i>Batophila rubi</i>              | Bulgaria | Balkanec               | 2015 | W00036c |                 | MG987843 | +        | +        | +        | +        | +        |
| <i>Bembidion articulatum</i>       | Poland   | Tarnawa                | 2015 | W00148a | MH020421        |          |          |          |          |          |          |
| <i>Bembidion articulatum</i>       | Poland   | Rdzawa                 | 2015 | W00148b | MH020422        |          |          |          |          |          |          |
| <i>Bembidion articulatum</i>       | Slovakia | Rokytov                | 2017 | W00148f |                 |          |          |          |          |          |          |
| <i>Bembidion decorum</i>           | Poland   | Nowa Biała             | 2014 | W00149c | MF170685        |          |          |          |          |          |          |
| <i>Bembidion decorum</i>           | Slovakia | Rokytov                | 2017 | W00149d | MF170684        |          |          |          |          |          |          |
| <i>Bembidion decorum</i>           | Bulgaria | Pawel Banja            | 2015 | W00149f | MF170683        |          |          |          |          |          |          |
| <i>Bembidion modestum</i>          | Romania  | Moldova                | 2016 | W00257a | MF170689        |          |          |          |          |          |          |
| <i>Bembidion modestum</i>          | Czechia  | Kopytov                | 2016 | W00257b | MF170688        |          |          |          |          |          |          |
| <i>Bembidion modestum</i>          | Poland   | Fałkowice              | 2017 | W00257c | MF170686        |          |          |          |          |          |          |
| <i>Bembidion punctulatum</i>       | Poland   | Domosławice            | 2017 | W00256a | MF170693        |          | MF170749 | MF170763 | MF170777 | MF170805 | MF170791 |
| <i>Bembidion punctulatum</i>       | Romania  | Moldova                | 2016 | W00256b | MF170695        |          | MF170751 | MF170765 | MF170779 | MF170807 | MF170793 |
| <i>Bembidion punctulatum</i>       | Czechia  | Kopytov                | 2016 | W00256c | MF170694        |          | MF170750 | MF170764 | MF170778 | MF170806 | MF170792 |
| <i>Bembidion punctulatum</i>       | Poland   | Fałkowice              | 2017 | W00256d | MF170691        |          | MF170748 | MF170762 | MF170776 | MF170804 | MF170790 |
| <i>Bembidion varicolor</i>         | Poland   | Domosławice            | 2017 | W00150a | MF170679        |          | +        | MF170743 | MF170757 | MF170771 | MF170799 |
| <i>Bembidion varicolor</i>         | Romania  | Moldova                | 2016 | W00150b | MF170681        |          | +        | MF170746 | MF170760 | MF170774 | MF170788 |
| <i>Bembidion varicolor</i>         | Romania  | Moldova                | 2016 | W00150c |                 |          |          | MF170747 | MF170761 | MF170775 | MF170789 |
| <i>Bembidion varicolor</i>         | Poland   | Fałkowice              | 2017 | W00150d | MF170678        |          |          | MF170742 | MF170756 | MF170770 | MF170784 |
| <i>Bembidion varicolor</i>         | Slovakia | Andrejovka             | 2017 | W00150e | MF170680        |          |          | MF170744 | MF170758 | MF170772 | MF170800 |
| <i>Bembidion varicolor</i>         | Slovakia | Topľa river valley     | 2017 | W00150f |                 |          |          | MF170745 | MF170759 | MF170773 | MF170787 |
| <i>Bembidion varium</i>            | Poland   | Lipnica Wielka         | 2017 | W00258a | MH020423        | MG987855 | MG987913 | MG987662 | MG987728 | MG987679 | MG988047 |
| <i>Bembidion varium</i>            | Romania  | Moldova                | 2016 | W00258b | MH020424        | MG987856 | MG987915 | MG987663 | MG987730 | MG987680 | MG988045 |
| <i>Bembidion varium</i>            | Bulgaria | Pawel Banja            | 2015 | W00258c | MH020425        | MG987907 | MG987914 | MG987664 | MG987729 | +        | MG988046 |
| <i>Bitoma crenata</i>              | Poland   | Szyk                   | 2014 | W00134a | MH020302        |          |          |          |          |          |          |
| <i>Bitoma crenata</i>              | Poland   | Szyk                   | 2014 | W00134b | MH020303        |          |          |          |          |          |          |
| <i>Bitoma crenata</i>              | Poland   | Łążek                  | 2017 | W00134c |                 |          |          |          |          |          |          |
| <i>Blitopertha lineolata</i>       | Bulgaria | Anevo                  | 2015 | W00116a | MH115532        |          |          |          |          |          |          |
| <i>Blitopertha lineolata</i>       | Bulgaria | Anevo                  | 2015 | W00116b |                 |          |          |          |          | +        |          |
| <i>Blitopertha lineolata</i>       | Bulgaria | Pawel Banja            | 2015 | W00116c |                 |          |          |          |          |          |          |
| <i>Bostrichus capucinus</i>        | Austria  | Füllersdorf            | 2016 | W00072a | MH115570        |          |          |          |          |          |          |
| <i>Bostrichus capucinus</i>        | Poland   | Grajów                 | 2017 | W00072b |                 |          |          |          |          |          |          |
| <i>Brachyleptura maculicornis</i>  | Poland   | Rogalin                | 2016 | W00083a | <u>KU25569J</u> |          |          |          |          |          |          |
| <i>Brachyleptura maculicornis</i>  | Poland   | Chrusty                | 2015 | W00083b |                 |          |          |          |          |          |          |
| <i>Brosicus cephalotes</i>         | Poland   | Nowe Sady              | 2014 | W00222a | MH020419        |          |          |          |          |          |          |
| <i>Brosicus cephalotes</i>         | Poland   | Odolion ad Ciechocinek | 2016 | W00222b | MH020420        |          |          |          |          |          |          |
| <i>Bruchidius cf. varius</i>       | Poland   | Kędzierzyn-Koźle       | 2014 | W00037a | MH020271        |          |          |          |          |          |          |
| <i>Bruchidius cf. varius</i>       | Poland   | Kędzierzyn-Koźle       | 2014 | W00037b |                 |          |          |          |          |          |          |
| <i>Bruchidius cf. varius</i>       | Poland   | Pawel Banja            | 2015 | W00037c |                 |          |          |          |          |          |          |
| <i>Bruchus affinis</i>             | Poland   | Sromowce Wyżne         | 2014 | W00019a | MH020262        |          |          |          |          |          |          |
| <i>Bruchus affinis</i>             | Poland   | Radzionków             | 2014 | W00019b | MH020263        |          |          |          |          |          |          |
| <i>Bruchus affinis</i>             | Poland   | Ligota Dolna           | 2015 | W00019c |                 |          |          |          |          |          |          |
| <i>Bruchus atomarius</i>           | Poland   | Wdżar Mt.              | 2014 | W00020a | MH319816        |          |          |          |          |          |          |
| <i>Bruchus atomarius</i>           | Poland   | Zdzieszowice           | 2015 | W00020b |                 |          |          |          |          | +        |          |
| <i>Bruchus atomarius</i>           | Poland   | Jarmuta Mt.            | 2014 | W00020c |                 |          |          |          |          | +        |          |
| <i>Bruchus brachialis</i>          | Poland   | Nowa Wieś              | 2014 | W00038a | MH020270        |          |          |          |          |          |          |
| <i>Bruchus brachialis</i>          | Poland   | Kędzierzyn-Koźle       | 2014 | W00038b |                 |          |          |          |          |          |          |
| <i>Bruchus brachialis</i>          | Poland   | Kędzierzyn-Koźle       | 2014 | W00038c |                 |          |          |          |          |          |          |
| <i>Bruchus loti</i>                | Poland   | Sromowce Wyżne         | 2014 | W00021a | MH020267        |          |          |          |          |          |          |
| <i>Bruchus loti</i>                | Poland   | Ligota Dolna           | 2015 | W00021b | MH020268        |          |          |          |          |          |          |
| <i>Bruchus loti</i>                | Bulgaria | Balkanec               | 2015 | W00021c | MH020269        |          |          |          |          |          |          |
| <i>Bruchus viciae</i>              | Bulgaria | Anevo                  | 2015 | W00022a | MH020264        |          |          |          |          |          |          |
| <i>Bruchus viciae</i>              | Bulgaria | Twyrdica               | 2015 | W00022b | MH020265        |          |          |          |          |          |          |
| <i>Bruchus viciae</i>              | Bulgaria | Pawel Banja            | 2015 | W00022c | MH020266        |          |          |          |          |          |          |
| <i>Caccobius schreberi</i>         | Romania  | Tanacu                 | 2016 | W00094a |                 |          |          |          |          |          |          |
| <i>Caccobius schreberi</i>         | Poland   | Wielopole              | 2015 | W00094b | MH020304        |          |          |          |          |          |          |
| <i>Calathus fuscipes</i>           | Romania  | Moldova                | 2016 | W00213a | MH020379        |          |          |          |          |          |          |
| <i>Calathus fuscipes</i>           | Poland   | Żerostawice            | 2016 | W00213b | MH020380        |          |          |          |          |          |          |
| <i>Calathus fuscipes</i>           | Bulgaria | Karlovo                | 2015 | W00213c | MH020381        |          |          |          |          |          |          |
| <i>Calvia quatuordecimpunctata</i> | Austria  | Porrau                 | 2015 | W00181a |                 |          |          |          |          |          |          |
| <i>Calvia quatuordecimpunctata</i> | Poland   | Białowieża Forest      | 2014 | W00181b | MH115503        |          |          |          |          |          |          |
| <i>Cantharis livida</i>            | Slovakia | Turydica               | 2016 | W00047a | MH115526        |          |          |          |          |          |          |
| <i>Cantharis livida</i>            | Romania  | Brezoi                 | 2015 | W00047b |                 |          |          |          |          | +        |          |
| <i>Cantharis nigricans</i>         | Poland   | Jarmuta Mt.            | 2014 | W00043a | MH115525        |          |          |          |          |          |          |
| <i>Cantharis nigricans</i>         | Poland   | Kędzierzyn-Koźle       | 2014 | W00043b |                 |          |          |          |          |          |          |
| <i>Cantharis nigricans</i>         | Poland   | Krempachy              | 2014 | W00043c |                 |          |          |          |          |          |          |
| <i>Cantharis rustica</i>           | Poland   | Dursztyn               | 2014 | W00046a | MH115524        |          |          |          |          |          |          |
| <i>Cantharis rustica</i>           | Romania  | Brezoi                 | 2015 | W00046b | MH115523        |          |          |          |          |          |          |
| <i>Carabus cancellatus</i>         | Poland   | Sulów                  | 2017 | W00145a | MH020417        |          |          |          |          |          |          |
| <i>Carabus cancellatus</i>         | Poland   | Zamość                 | 2016 | W00145b | MH020418        |          |          |          |          |          |          |
| <i>Carabus coriaceus</i>           | Poland   | Chełm                  | 2015 | W00207a | MH020374        |          |          |          |          |          |          |
| <i>Carabus coriaceus</i>           | Poland   | Chełm                  | 2015 | W00207b |                 |          |          |          |          |          |          |
| <i>Carabus coriaceus</i>           | Poland   | Buczków                | 2014 | W00207c | MH020375        |          |          |          |          |          |          |
| <i>Carabus coriaceus</i>           | Poland   | Białowieża Forest      | 2014 | W00207d |                 |          |          |          |          |          |          |
| <i>Carabus glabratus</i>           | Slovakia | Bratislava             | 2016 | W00209a | MH020371        |          |          |          |          |          |          |
| <i>Carabus glabratus</i>           | Poland   | Walsza river valley    | 2017 | W00209b | MH020372        | MG987874 |          |          |          |          |          |
| <i>Carabus glabratus</i>           | Poland   | Białowieża Forest      | 2014 | W00209c |                 |          |          |          |          |          |          |
| <i>Carabus granulatus</i>          | Poland   | Zamość                 | 2016 | W00144a | MH020376        |          |          |          |          |          |          |
| <i>Carabus granulatus</i>          | Poland   | Graziowa               | 2017 | W00144b | MH020377        |          |          |          |          |          |          |
| <i>Carabus granulatus</i>          | Poland   | Białowieża Forest      | 2014 | W00144c |                 |          |          |          |          |          |          |
| <i>Carabus granulatus</i>          | Poland   | Lublin                 | 2015 | W00144d |                 |          |          |          |          |          |          |







|                                     |          |                    |      |         |                 |          |          |          |          |          |          |  |  |  |  |  |  |  |          |
|-------------------------------------|----------|--------------------|------|---------|-----------------|----------|----------|----------|----------|----------|----------|--|--|--|--|--|--|--|----------|
| <i>Eutrichapion melancholicum</i>   | Poland   | Przemysł           | 2014 | W00308b | MH218860        |          |          |          |          |          |          |  |  |  |  |  |  |  |          |
| <i>Eutrichapion viciae</i>          | Poland   | Korzecko           | 2015 | W00309a | MH218857        |          |          |          |          |          |          |  |  |  |  |  |  |  |          |
| <i>Eutrichapion viciae</i>          | Poland   | Korzecko           | 2015 | W00309b | MH218858        |          |          |          |          |          |          |  |  |  |  |  |  |  |          |
| <i>Exochomus quadripustulatus</i>   | Slovakia | Sampor             | 2017 | W00169a | MH115507        |          |          |          |          |          |          |  |  |  |  |  |  |  |          |
| <i>Exochomus quadripustulatus</i>   | Slovakia | Studienka          | 2016 | W00169b | MH115508        |          |          |          |          |          |          |  |  |  |  |  |  |  |          |
| <i>Exochomus quadripustulatus</i>   | Slovakia | Pernek             | 2016 | W00169c |                 |          |          |          |          |          |          |  |  |  |  |  |  |  |          |
| <i>Exochomus quadripustulatus</i>   | Poland   | Miszek             | 2016 | W00169d | +               |          |          |          |          |          |          |  |  |  |  |  |  |  |          |
| <i>Galeruca tanacetii</i>           | Bulgaria | Karlovo            | 2015 | W00041a | MH020463        |          |          |          |          |          |          |  |  |  |  |  |  |  |          |
| <i>Galeruca tanacetii</i>           | Bulgaria | Karlovo            | 2015 | W00041b |                 |          |          |          |          |          |          |  |  |  |  |  |  |  |          |
| <i>Galeruca tanacetii</i>           | Bulgaria | Paweł Banja        | 2015 | W00041c |                 |          |          |          |          |          |          |  |  |  |  |  |  |  |          |
| <i>Galerucella tenella</i>          | Poland   | Wdżar Mt.          | 2014 | W00042a | MH020460        |          |          |          |          |          |          |  |  |  |  |  |  |  |          |
| <i>Galerucella tenella</i>          | Poland   | Łąpsze Niżne       | 2014 | W00042b |                 |          |          |          |          |          |          |  |  |  |  |  |  |  |          |
| <i>Galerucella tenella</i>          | Poland   | Dursztyn           | 2014 | W00042c |                 |          |          |          |          |          |          |  |  |  |  |  |  |  |          |
| <i>Gnaptor spinimanus</i>           | Bulgaria | Karnare            | 2015 | W00068a | <u>KX388742</u> |          |          |          |          |          |          |  |  |  |  |  |  |  |          |
| <i>Gnaptor spinimanus</i>           | Romania  | Didesti            | 2016 | W00068b |                 |          |          |          |          |          |          |  |  |  |  |  |  |  |          |
| <i>Gnaptor spinimanus</i>           | Romania  | Tanacu             | 2016 | W00068c |                 |          |          |          |          |          |          |  |  |  |  |  |  |  |          |
| <i>Gnaptor spinimanus</i>           | Bulgaria | Anevo              | 2015 | W00068d |                 |          |          |          |          |          |          |  |  |  |  |  |  |  |          |
| <i>Harpalus affinis</i>             | Poland   | Mogielica Mt.      | 2015 | W00216a |                 |          |          |          |          |          |          |  |  |  |  |  |  |  |          |
| <i>Harpalus affinis</i>             | Romania  | Páscoaia           | 2016 | W00216b |                 |          |          |          |          |          |          |  |  |  |  |  |  |  |          |
| <i>Harpalus rufipes</i>             | Poland   | Chełm              | 2015 | W00199a | MH020398        |          |          |          |          |          |          |  |  |  |  |  |  |  |          |
| <i>Harpalus rufipes</i>             | Poland   | Sulów              | 2017 | W00199b | MH020399        |          |          |          |          |          |          |  |  |  |  |  |  |  |          |
| <i>Harpalus rufipes</i>             | Poland   | Okale              | 2015 | W00199c | +               |          |          |          |          |          |          |  |  |  |  |  |  |  |          |
| <i>Hippodamia variegata</i>         | Slovakia | Horná Mčiňá        | 2016 | W00175a | MH115504        |          |          |          |          |          |          |  |  |  |  |  |  |  |          |
| <i>Hippodamia variegata</i>         | Slovakia | Horná Mčiňá        | 2016 | W00175b |                 |          |          |          |          |          |          |  |  |  |  |  |  |  |          |
| <i>Hylobius abietis</i>             | Bulgaria | Paweł Banja        | 2015 | W00294a | MH115471        |          |          |          |          |          |          |  |  |  |  |  |  |  |          |
| <i>Hylobius abietis</i>             | Bulgaria | Elena              | 2015 | W00294b |                 | MG987817 | MG987928 | MG987647 | MG987745 |          |          |  |  |  |  |  |  |  | MG987971 |
| <i>Hylobius abietis</i>             | Romania  | Făgăraș Mts.       | 2015 | W00294c | +               |          |          |          |          |          |          |  |  |  |  |  |  |  |          |
| <i>Hylotrupes bajulus</i>           | Poland   | Białowieża Forest  | 2016 | W00264a | MH020455        |          |          |          |          |          |          |  |  |  |  |  |  |  |          |
| <i>Hylotrupes bajulus</i>           | Poland   | Białowieża Forest  | 2016 | W00264b | MH020456        |          |          |          |          |          |          |  |  |  |  |  |  |  |          |
| <i>Ips typographus</i>              | Poland   | Białowieża Forest  | 2016 | W00114a | MH115481        |          |          |          |          |          |          |  |  |  |  |  |  |  |          |
| <i>Ips typographus</i>              | Poland   | Białowieża Forest  | 2016 | W00114b | +               |          |          |          |          |          |          |  |  |  |  |  |  |  |          |
| <i>Ips typographus</i>              | Slovakia | Cisty              | 2017 | W00114c |                 |          |          |          |          |          |          |  |  |  |  |  |  |  |          |
| <i>Kateretes pedicularius</i>       | Poland   | Kolonowskie        | 2015 | W00058a | MH020488        |          |          |          |          |          |          |  |  |  |  |  |  |  |          |
| <i>Kateretes pedicularius</i>       | Poland   | Nowa Wieś Królówka | 2016 | W00058b | MH020489        |          |          |          |          |          |          |  |  |  |  |  |  |  |          |
| <i>Kateretes pedicularius</i>       | Poland   | Nowa Wieś Królówka | 2016 | W00058c |                 |          |          |          |          |          |          |  |  |  |  |  |  |  |          |
| <i>Lagria hirta</i>                 | Slovakia | Kremnicke Vrchy    | 2016 | W00156a | MH115560        | MG987875 |          |          |          |          |          |  |  |  |  |  |  |  |          |
| <i>Lagria hirta</i>                 | Poland   | Należczów          | 2015 | W00156b |                 |          |          |          |          |          |          |  |  |  |  |  |  |  |          |
| <i>Lagria hirta</i>                 | Poland   | Białowieża Forest  | 2016 | W00156c |                 | MG987876 |          |          |          |          |          |  |  |  |  |  |  |  |          |
| <i>Litargus connexus</i>            | Poland   | Kolonowskie        | 2015 | W00288a | MH020363        |          |          |          |          |          |          |  |  |  |  |  |  |  |          |
| <i>Lixus filiformis</i>             | Bulgaria | Stara Planina Mts. | 2015 | W00293a |                 |          |          |          |          |          |          |  |  |  |  |  |  |  |          |
| <i>Lixus filiformis</i>             | Bulgaria | Anevo              | 2015 | W00293b | MH115475        |          |          |          |          |          |          |  |  |  |  |  |  |  |          |
| <i>Lixus filiformis</i>             | Bulgaria | Anevo              | 2015 | W00293c |                 |          |          |          |          |          |          |  |  |  |  |  |  |  |          |
| <i>Lochmaea caprea</i>              | Poland   | Niedzica           | 2014 | W00051a | +               |          |          |          |          |          |          |  |  |  |  |  |  |  |          |
| <i>Lochmaea caprea</i>              | Romania  | Tau Bistrica       | 2015 | W00051b |                 |          |          |          |          |          |          |  |  |  |  |  |  |  |          |
| <i>Lochmaea caprea</i>              | Croatia  | Pomena             | 2016 | W00051c |                 |          |          |          |          |          |          |  |  |  |  |  |  |  |          |
| <i>Longitarsus exsoletus</i>        | Poland   | Szymiszów          | 2014 | W00031a | MH020464        |          |          |          |          |          |          |  |  |  |  |  |  |  |          |
| <i>Longitarsus exsoletus</i>        | Poland   | Krempachy          | 2014 | W00031b |                 |          |          |          |          |          |          |  |  |  |  |  |  |  |          |
| <i>Longitarsus exsoletus</i>        | Poland   | Cisowa Skala       | 2014 | W00031c |                 |          |          |          |          |          |          |  |  |  |  |  |  |  |          |
| <i>Longitarsus nasturtii</i>        | Poland   | Krempachy          | 2014 | W00032a |                 |          |          |          |          |          |          |  |  |  |  |  |  |  |          |
| <i>Longitarsus nasturtii</i>        | Poland   | Ligota Dolna       | 2015 | W00032b |                 |          |          |          |          |          |          |  |  |  |  |  |  |  |          |
| <i>Longitarsus nasturtii</i>        | Poland   | Łąpsze Niżne       | 2014 | W00032c | MH271196        |          |          |          |          |          |          |  |  |  |  |  |  |  |          |
| <i>Loricera pilicornis</i>          | Poland   | Lublin             | 2015 | W00202a | MH020437        |          |          |          |          |          |          |  |  |  |  |  |  |  |          |
| <i>Loricera pilicornis</i>          | Poland   | Lublin             | 2015 | W00202b | MH020438        |          |          |          |          |          |          |  |  |  |  |  |  |  |          |
| <i>Loricera pilicornis</i>          | Poland   | Niebrzegów         | 2015 | W00202c | MH020439        |          |          |          |          |          |          |  |  |  |  |  |  |  |          |
| <i>Luperus flavipes</i>             | Poland   | Cisowa Skala       | 2014 | W00033a | MH020461        | MG987836 | MG987957 | MG987651 | MG987757 | MG987707 | MG988020 |  |  |  |  |  |  |  |          |
| <i>Luperus flavipes</i>             | Poland   | Szymiszów          | 2014 | W00033b |                 | MG987837 | MG987958 | MG987652 | MG987758 | MG987708 | MG988021 |  |  |  |  |  |  |  |          |
| <i>Luperus flavipes</i>             | Poland   | Krempachy          | 2014 | W00033c |                 | MG987840 |          |          | MG987768 |          | MG988015 |  |  |  |  |  |  |  |          |
| <i>Luperus luperus</i>              | Poland   | Wdżar Mt.          | 2014 | W00034a | MH020462        | MG987838 | MG987959 |          | MG987759 | MG987709 | MG988018 |  |  |  |  |  |  |  |          |
| <i>Luperus luperus</i>              | Poland   | Krempachy          | 2014 | W00034b |                 | MG987839 |          |          |          |          |          |  |  |  |  |  |  |  |          |
| <i>Luperus luperus</i>              | Poland   | Ligota Dolna       | 2015 | W00034c |                 |          |          |          |          |          |          |  |  |  |  |  |  |  |          |
| <i>Lygistopterus sanguineus</i>     | Poland   | Rogalin            | 2016 | W00137a | MH115527        |          |          |          |          |          |          |  |  |  |  |  |  |  |          |
| <i>Lygistopterus sanguineus</i>     | Poland   | Białowieża Forest  | 2016 | W00137b | MH115528        |          |          |          |          |          |          |  |  |  |  |  |  |  |          |
| <i>Lygistopterus sanguineus</i>     | Poland   | Knyszyn Forest     | 2016 | W00137c |                 |          |          |          |          |          |          |  |  |  |  |  |  |  |          |
| <i>Mecinus pascuorum</i>            | Poland   | Murownia           | 2017 | W00302a | +               |          |          |          |          |          |          |  |  |  |  |  |  |  |          |
| <i>Mecinus pascuorum</i>            | Poland   | Murownia           | 2017 | W00302b | +               |          |          |          |          |          |          |  |  |  |  |  |  |  |          |
| <i>Mecinus pascuorum</i>            | Bulgaria | Anevo              | 2015 | W00302c |                 |          |          |          |          |          |          |  |  |  |  |  |  |  |          |
| <i>Melolontha melolontha</i>        | Romania  | Brezoi             | 2015 | W00060a | MH115534        |          |          |          |          |          |          |  |  |  |  |  |  |  |          |
| <i>Melolontha melolontha</i>        | Romania  | Brezoi             | 2015 | W00060b |                 |          |          |          |          |          |          |  |  |  |  |  |  |  |          |
| <i>Melolontha melolontha</i>        | Romania  | Brezoi             | 2015 | W00060c | +               |          |          |          |          |          |          |  |  |  |  |  |  |  |          |
| <i>Metacantharis discoidea</i>      | Poland   | Dursztyn           | 2014 | W00290a | +               |          |          |          |          |          |          |  |  |  |  |  |  |  |          |
| <i>Metacantharis discoidea</i>      | Poland   | Dursztyn           | 2014 | W00290b | +               |          |          |          |          |          |          |  |  |  |  |  |  |  |          |
| <i>Metacantharis discoidea</i>      | Poland   | Dursztyn           | 2014 | W00290c |                 |          |          |          |          |          |          |  |  |  |  |  |  |  |          |
| <i>Monochamus galloprovincialis</i> | Poland   | Kampinos           | 2015 | W00316a | MH271199        |          |          |          |          |          |          |  |  |  |  |  |  |  |          |
| <i>Monochamus galloprovincialis</i> | Poland   | Sieraków           | 2016 | W00316b | MH271200        |          |          |          |          |          |          |  |  |  |  |  |  |  |          |
| <i>Monochamus sartor sartor</i>     | Poland   | Komańcza           | 2015 | W00314a | MF371185        | MG987822 | MF405511 | MF405524 | MF405536 | MF405530 | MF405543 |  |  |  |  |  |  |  |          |
| <i>Monochamus sartor sartor</i>     | Poland   | Baligród           | 2015 | W00314b | MF371196        |          | MF405510 | MF405525 | MF405537 | MF405531 | MF405544 |  |  |  |  |  |  |  |          |
| <i>Monochamus sartor sartor</i>     | Poland   | Pieniny Mts        | 2015 | W00314c | MF371201        |          | MF405512 | MF405526 | MF405538 | MF405532 | MF405545 |  |  |  |  |  |  |  |          |
| <i>Monochamus sartor urussovii</i>  | Poland   | Białowieża Forest  | 2016 | W00313a | MF327411        | MG987827 | MF405508 | MF405521 | MF405533 | MF405527 | MF405540 |  |  |  |  |  |  |  |          |
| <i>Monochamus sartor urussovii</i>  | Poland   | Knyszyn Forest     | 2015 | W00313b | MF327421        |          | MF405509 | MF405522 | MF405534 | MF405528 | MF405541 |  |  |  |  |  |  |  |          |
| <i>Monochamus sartor urussovii</i>  | Poland   | Augustów Forest    | 2016 | W00313c | MF327418        |          | MF405507 | MF405523 | MF405535 | MF405529 | MF405542 |  |  |  |  |  |  |  |          |
| <i>Monochamus sutor</i>             | Poland   | Borecka Forest     | 2015 | W00315a | MH271201        |          |          |          |          |          |          |  |  |  |  |  |  |  |          |
| <i>Monochamus sutor</i>             | Poland   | Borecka Forest     | 2015 | W00315b | MH271202        |          |          |          |          |          |          |  |  |  |  |  |  |  |          |
| <i>Mordella brachyura</i>           | Poland   | Chrusty            | 2015 | W00108a | MH115567        |          |          |          |          |          |          |  |  |  |  |  |  |  |          |
| <i>Mordella brachyura</i>           | Poland   | Chrusty            | 2015 | W       |                 |          |          |          |          |          |          |  |  |  |  |  |  |  |          |







|                                   |          |                   |      |         |          |          |
|-----------------------------------|----------|-------------------|------|---------|----------|----------|
| <i>Tropinota hirta</i>            | Poland   | Tynieć            | 2016 | W00105a | +        |          |
| <i>Tropinota hirta</i>            | Bulgaria | Anevo             | 2015 | W00105b | MH020443 |          |
| <i>Tropinota hirta</i>            | Bulgaria | Anevo             | 2015 | W00105c |          |          |
| <i>Trypocopris vernalis</i>       | Poland   | Białowieża Forest | 2015 | W00069a | +        |          |
| <i>Trypocopris vernalis</i>       | Bulgaria | Karnare           | 2015 | W00069b |          |          |
| <i>Trypocopris vernalis</i>       | Austria  | Edelstal          | 2015 | W00069c |          |          |
| <i>Trypodendron lineatum</i>      | Poland   | Łapsze Niżne      | 2014 | W00112a | MH115574 |          |
| <i>Trypodendron lineatum</i>      | Poland   | Łapsze Niżne      | 2014 | W00112b | +        |          |
| <i>Trypodendron lineatum</i>      | Poland   | Łapsze Niżne      | 2014 | W00112c |          |          |
| <i>Tytthaspis sedecimpunctata</i> | Slovakia | Sampor            | 2017 | W00176a | MH020507 |          |
| <i>Uleiota planata</i>            | Poland   | Szyk              | 2014 | W00133a | MH115565 |          |
| <i>Uleiota planata</i>            | Poland   | Szyk              | 2014 | W00133b | +        |          |
| <i>Uleiota planata</i>            | Poland   | Ciechocinek       | 2016 | W00133c | +        |          |
| <i>Uloma culinaris</i>            | Poland   | Rogalin           | 2014 | W00154a | MH020548 | MG987810 |
| <i>Uloma culinaris</i>            | Poland   | Ispina            | 2014 | W00154b |          | MG987811 |
| <i>Uloma culinaris</i>            | Poland   | Ispina            | 2014 | W00154c | MH020549 | MG987812 |
| <i>Valgus hemipterus</i>          | Poland   | Alwernia          | 2015 | W00076a | +        |          |
| <i>Valgus hemipterus</i>          | Bulgaria | Brezovo Mt.       | 2015 | W00076b | MH020440 |          |
| <i>Valgus hemipterus</i>          | Bulgaria | Gintsi            | 2015 | W00076c | MH020441 |          |

Supplementary Table S5. Taxonomy and trait characteristics and *Wolbachia* infection status of examined beetle species.

Phyto – phytophagous, Myceto – mycetophagous, Pred – predators, Sapro – saprophagous, Wood – Cambioxylophagous, Forest – forest-dwellers, Open – open land-dwellers, Ubiq – ubiquitous, Copro – coprophilous, Epig – epigeic, Herb – herbophilous, Hydro – hydrophilous, Fungi – mycetophilous, Necro – necrophilous, Xylo – cambioxylophilous, Cont – continental, Medit – mediterranean, Mount – mountainous, Temp – temperate, Fragn – fragmented, Wide –widespread, Neut – neutral temperature, Warm – warm temperature, Parth – parthenogenetic, Sex – (bi)sexual, Large – large size, Medium – medium size, Small – small size, Mobile – mobile, Seden – sedentary.

| No. | species                              | family        | superfamily    | infraorder      | suborder  | trophism | habitat preferences | micro-habitats | distribution | range | thermal preferences | reproduction mode | body size | mobility | infection | supergroup A | supergroup B |
|-----|--------------------------------------|---------------|----------------|-----------------|-----------|----------|---------------------|----------------|--------------|-------|---------------------|-------------------|-----------|----------|-----------|--------------|--------------|
| 1   | <i>Abax parallelepipedus</i>         | Carabidae     | Caraboidea     | Carabiformia    | Adephaga  | Pred     | Forest              | Epig           | Temp         | Wide  | Neut                | Sex               | Large     | Mobil    | 0         | 0            | 0            |
| 2   | <i>Abax parallelus</i>               | Carabidae     | Caraboidea     | Carabiformia    | Adephaga  | Pred     | Forest              | Epig           | Temp         | Wide  | Neut                | Sex               | Med       | Mobil    | 1         | 1            | 0            |
| 3   | <i>Adalia bipunctata</i>             | Coccinellidae | Cucujoidea     | Cucujiformia    | Polyphaga | Pred     | Ubiq                | Herb           | Temp         | Wide  | Neut                | Sex               | Med       | Mobil    | 0         | 0            | 0            |
| 4   | <i>Agapanthia villosoviridescens</i> | Cerambycidae  | Chrysomeloidea | Cucujiformia    | Polyphaga | Phyto    | Ubiq                | Herb           | Temp         | Wide  | Neut                | Sex               | Small     | Mobil    | 0         | 0            | 0            |
| 5   | <i>Agonum marginatum</i>             | Carabidae     | Caraboidea     | Carabiformia    | Adephaga  | Pred     | Open                | Hydro          | Temp         | Wide  | Neut                | Sex               | Med       | Mobil    | 1         | 1            | 1            |
| 6   | <i>Agrilus derasofasciatus</i>       | Buprestidae   | Buprestoidea   | Elateriformia   | Polyphaga | Wood     | Forest              | Xylo           | Medit        | Wide  | Warm                | Sex               | Small     | Mobil    | 0         | 0            | 0            |
| 7   | <i>Agrilus suvorovi</i>              | Buprestidae   | Buprestoidea   | Elateriformia   | Polyphaga | Wood     | Forest              | Xylo           | Temp         | Wide  | Neut                | Sex               | Med       | Mobil    | 0         | 0            | 0            |
| 8   | <i>Agrypnus murinus</i>              | Elateridae    | Elateroidea    | Elateriformia   | Polyphaga | Pred     | Open                | Epig           | Temp         | Wide  | Neut                | Sex               | Med       | Mobil    | 0         | 0            | 0            |
| 9   | <i>Alosterna tabacicolor</i>         | Cerambycidae  | Chrysomeloidea | Cucujiformia    | Polyphaga | Wood     | Forest              | Xylo           | Temp         | Wide  | Neut                | Sex               | Med       | Mobil    | 0         | 0            | 0            |
| 10  | <i>Altica oleracea</i>               | Chrysomelidae | Chrysomeloidea | Cucujiformia    | Polyphaga | Phyto    | Ubiq                | Herb           | Temp         | Wide  | Neut                | Sex               | Small     | Mobil    | 0         | 0            | 0            |
| 11  | <i>Amara similata</i>                | Carabidae     | Caraboidea     | Carabiformia    | Adephaga  | Pred     | Open                | Epig           | Temp         | Wide  | Warm                | Sex               | Med       | Mobil    | 1         | 1            | 0            |
| 12  | <i>Amphimallon solstitialis</i>      | Scarabaeidae  | Scarabaeoidea  | Scarabaeiformia | Polyphaga | Phyto    | Ubiq                | Herb           | Temp         | Wide  | Neut                | Sex               | Med       | Mobil    | 0         | 0            | 0            |
| 13  | <i>Anaspis brunnipes</i>             | Scraptiidae   | Tenebrionoidea | Cucujiformia    | Polyphaga | Wood     | Open                | Xylo           | Temp         | Wide  | Warm                | Sex               | Small     | Mobil    | 1         | 1            | 0            |
| 14  | <i>Anaspis frontalis</i>             | Scraptiidae   | Tenebrionoidea | Cucujiformia    | Polyphaga | Wood     | Forest              | Xylo           | Temp         | Wide  | Neut                | Sex               | Small     | Mobil    | 1         | 1            | 0            |
| 15  | <i>Anastrangalia reyi</i>            | Cerambycidae  | Chrysomeloidea | Cucujiformia    | Polyphaga | Wood     | Forest              | Xylo           | Temp         | Wide  | Neut                | Sex               | Med       | Mobil    | 1         | 1            | 0            |
| 16  | <i>Anastrangalia sanguinolenta</i>   | Cerambycidae  | Chrysomeloidea | Cucujiformia    | Polyphaga | Wood     | Forest              | Xylo           | Temp         | Wide  | Neut                | Sex               | Med       | Mobil    | 0         | 0            | 0            |
| 17  | <i>Anatis ocellata</i>               | Coccinellidae | Cucujoidea     | Cucujiformia    | Polyphaga | Pred     | Forest              | Herb           | Temp         | Wide  | Neut                | Sex               | Med       | Mobil    | 0         | 0            | 0            |
| 18  | <i>Anomala dubia</i>                 | Scarabaeidae  | Scarabaeoidea  | Scarabaeiformia | Polyphaga | Phyto    | Ubiq                | Herb           | Temp         | Wide  | Neut                | Sex               | Med       | Mobil    | 0         | 0            | 0            |
| 19  | <i>Anoplodera sexguttata</i>         | Cerambycidae  | Chrysomeloidea | Cucujiformia    | Polyphaga | Wood     | Forest              | Xylo           | Temp         | Fragn | Neut                | Sex               | Med       | Mobil    | 0         | 0            | 0            |
| 20  | <i>Anoplotrupes stercorosus</i>      | Geotrupidae   | Scarabaeoidea  | Scarabaeiformia | Polyphaga | Sapro    | Forest              | Epig           | Temp         | Wide  | Neut                | Sex               | Med       | Mobil    | 0         | 0            | 0            |
| 21  | <i>Anostirus castaneus</i>           | Elateridae    | Elateroidea    | Elateriformia   | Polyphaga | Pred     | Forest              | Xylo           | Temp         | Wide  | Neut                | Sex               | Med       | Mobil    | 0         | 0            | 0            |

|    |                                   |               |                |                 |           |       |        |       |       |       |      |     |       |       |   |   |   |
|----|-----------------------------------|---------------|----------------|-----------------|-----------|-------|--------|-------|-------|-------|------|-----|-------|-------|---|---|---|
| 22 | <i>Anthaxia nitidula</i>          | Buprestidae   | Buprestoidea   | Elateriformia   | Polyphaga | Wood  | Forest | Xylo  | Medit | Fragm | Warm | Sex | Med   | Mobil | 0 | 0 | 0 |
| 23 | <i>Anthaxia quadripunctata</i>    | Buprestidae   | Buprestoidea   | Elateriformia   | Polyphaga | Wood  | Forest | Xylo  | Temp  | Wide  | Neut | Sex | Med   | Mobil | 0 | 0 | 0 |
| 24 | <i>Anthonomus rubi</i>            | Curculionidae | Curculionoidea | Cucujiformia    | Polyphaga | Phyto | Ubiq   | Herb  | Temp  | Wide  | Neut | Sex | Small | Mobil | 1 | 1 | 1 |
| 25 | <i>Aphodius ater</i>              | Scarabaeidae  | Scarabaeoidea  | Scarabaeiformia | Polyphaga | Sapro | Open   | Copro | Temp  | Wide  | Neut | Sex | Med   | Mobil | 0 | 0 | 1 |
| 26 | <i>Aphodius depressus</i>         | Scarabaeidae  | Scarabaeoidea  | Scarabaeiformia | Polyphaga | Sapro | Open   | Copro | Temp  | Wide  | Neut | Sex | Med   | Mobil | 0 | 0 | 0 |
| 27 | <i>Aphodius erraticus</i>         | Scarabaeidae  | Scarabaeoidea  | Scarabaeiformia | Polyphaga | Sapro | Open   | Copro | Temp  | Wide  | Neut | Sex | Med   | Mobil | 0 | 0 | 0 |
| 28 | <i>Aphodius fossor</i>            | Scarabaeidae  | Scarabaeoidea  | Scarabaeiformia | Polyphaga | Sapro | Ubiq   | Copro | Temp  | Wide  | Neut | Sex | Med   | Mobil | 0 | 0 | 0 |
| 29 | <i>Aphodius granarius</i>         | Scarabaeidae  | Scarabaeoidea  | Scarabaeiformia | Polyphaga | Sapro | Open   | Copro | Temp  | Wide  | Neut | Sex | Med   | Mobil | 1 | 0 | 1 |
| 30 | <i>Aphodius haemorrhoidalis</i>   | Scarabaeidae  | Scarabaeoidea  | Scarabaeiformia | Polyphaga | Sapro | Open   | Copro | Temp  | Wide  | Neut | Sex | Med   | Mobil | 1 | 0 | 1 |
| 31 | <i>Aphodius luridus</i>           | Scarabaeidae  | Scarabaeoidea  | Scarabaeiformia | Polyphaga | Sapro | Open   | Copro | Temp  | Wide  | Warm | Sex | Med   | Mobil | 0 | 0 | 0 |
| 32 | <i>Aphodius pedellus</i>          | Scarabaeidae  | Scarabaeoidea  | Scarabaeiformia | Polyphaga | Sapro | Open   | Copro | Temp  | Wide  | Neut | Sex | Med   | Mobil | 0 | 0 | 0 |
| 33 | <i>Aphodius pusillus</i>          | Scarabaeidae  | Scarabaeoidea  | Scarabaeiformia | Polyphaga | Sapro | Open   | Copro | Temp  | Wide  | Neut | Sex | Med   | Mobil | 0 | 0 | 0 |
| 34 | <i>Aphodius scrutator</i>         | Scarabaeidae  | Scarabaeoidea  | Scarabaeiformia | Polyphaga | Sapro | Open   | Copro | Cont  | Fragm | Warm | Sex | Med   | Mobil | 0 | 0 | 0 |
| 35 | <i>Aphodius sphaecelatus</i>      | Scarabaeidae  | Scarabaeoidea  | Scarabaeiformia | Polyphaga | Sapro | Open   | Copro | Temp  | Wide  | Neut | Sex | Med   | Mobil | 0 | 0 | 0 |
| 36 | <i>Aphodius sticticus</i>         | Scarabaeidae  | Scarabaeoidea  | Scarabaeiformia | Polyphaga | Sapro | Forest | Copro | Temp  | Wide  | Neut | Sex | Med   | Mobil | 1 | 0 | 1 |
| 37 | <i>Aphthona venustula</i>         | Chrysomelidae | Chrysomeloidea | Cucujiformia    | Polyphaga | Phyto | Open   | Herb  | Medit | Fragm | Warm | Sex | Small | Mobil | 1 | 0 | 1 |
| 38 | <i>Arhopalus rusticus</i>         | Cerambycidae  | Chrysomeloidea | Cucujiformia    | Polyphaga | Wood  | Forest | Xylo  | Temp  | Wide  | Neut | Sex | Large | Mobil | 1 | 1 | 0 |
| 39 | <i>Aromia moschata</i>            | Cerambycidae  | Chrysomeloidea | Cucujiformia    | Polyphaga | Wood  | Forest | Xylo  | Temp  | Wide  | Neut | Sex | Med   | Mobil | 0 | 0 | 0 |
| 40 | <i>Athous subfuscus</i>           | Elateridae    | Elateroidea    | Elateriformia   | Polyphaga | Pred  | Ubiq   | Epig  | Temp  | Wide  | Neut | Sex | Med   | Mobil | 0 | 0 | 0 |
| 41 | <i>Attagenus pelli</i>            | Dermestidae   | Bostrichoidea  | Bostrichiformia | Polyphaga | Sapro | Ubiq   | Necro | Temp  | Wide  | Neut | Sex | Med   | Mobil | 0 | 0 | 0 |
| 42 | <i>Batophila rubi</i>             | Chrysomelidae | Chrysomeloidea | Cucujiformia    | Polyphaga | Phyto | Ubiq   | Herb  | Temp  | Wide  | Neut | Sex | Small | Mobil | 1 | 1 | 0 |
| 43 | <i>Bembidion articulatum</i>      | Carabidae     | Caraboidea     | Carabiformia    | Adephaga  | Pred  | Open   | Hydro | Temp  | Wide  | Neut | Sex | Med   | Mobil | 0 | 0 | 0 |
| 44 | <i>Bembidion decorum</i>          | Carabidae     | Caraboidea     | Carabiformia    | Adephaga  | Pred  | Open   | Hydro | Mount | Fragm | Neut | Sex | Med   | Mobil | 0 | 0 | 0 |
| 45 | <i>Bembidion modestum</i>         | Carabidae     | Caraboidea     | Carabiformia    | Adephaga  | Pred  | Open   | Hydro | Mount | Fragm | Neut | Sex | Med   | Mobil | 0 | 0 | 0 |
| 46 | <i>Bembidion punctulatum</i>      | Carabidae     | Caraboidea     | Carabiformia    | Adephaga  | Pred  | Open   | Hydro | Temp  | Wide  | Neut | Sex | Med   | Mobil | 1 | 0 | 1 |
| 47 | <i>Bembidion varicolor</i>        | Carabidae     | Caraboidea     | Carabiformia    | Adephaga  | Pred  | Open   | Hydro | Mount | Fragm | Neut | Sex | Med   | Mobil | 1 | 1 | 1 |
| 48 | <i>Bembidion varium</i>           | Carabidae     | Caraboidea     | Carabiformia    | Adephaga  | Pred  | Open   | Hydro | Temp  | Wide  | Neut | Sex | Med   | Mobil | 1 | 0 | 1 |
| 49 | <i>Bitoma crenata</i>             | Zopheridae    | Tenebrionoidea | Cucujiformia    | Polyphaga | Sapro | Forest | Xylo  | Temp  | Wide  | Neut | Sex | Small | Seden | 0 | 0 | 0 |
| 50 | <i>Blitopertha lineolata</i>      | Scarabaeidae  | Scarabaeoidea  | Scarabaeiformia | Polyphaga | Phyto | Open   | Herb  | Cont  | Fragm | Warm | Sex | Med   | Mobil | 0 | 0 | 0 |
| 51 | <i>Bostrichus capucinus</i>       | Bostrichidae  | Bostrichoidea  | Bostrichiformia | Polyphaga | Wood  | Forest | Xylo  | Temp  | Wide  | Neut | Sex | Med   | Mobil | 0 | 0 | 0 |
| 52 | <i>Brachyleptura maculicornis</i> | Cerambycidae  | Chrysomeloidea | Cucujiformia    | Polyphaga | Wood  | Forest | Xylo  | Temp  | Wide  | Neut | Sex | Med   | Mobil | 0 | 0 | 0 |
| 53 | <i>Broscus cephalotes</i>         | Carabidae     | Caraboidea     | Carabiformia    | Adephaga  | Pred  | Open   | Epig  | Temp  | Wide  | Neut | Sex | Med   | Mobil | 0 | 0 | 0 |
| 54 | <i>Bruchidius cf. varius</i>      | Chrysomelidae | Chrysomeloidea | Cucujiformia    | Polyphaga | Phyto | Open   | Herb  | Medit | Wide  | Warm | Sex | Small | Mobil | 0 | 0 | 0 |
| 55 | <i>Bruchus affinis</i>            | Chrysomelidae | Chrysomeloidea | Cucujiformia    | Polyphaga | Phyto | Open   | Herb  | Cont  | Wide  | Warm | Sex | Small | Mobil | 0 | 0 | 0 |
| 56 | <i>Bruchus atomarius</i>          | Chrysomelidae | Chrysomeloidea | Cucujiformia    | Polyphaga | Phyto | Open   | Herb  | Temp  | Wide  | Neut | Sex | Small | Mobil | 0 | 0 | 0 |



|    |                                    |               |                |                 |           |       |        |       |       |       |      |     |       |       |   |   |   |
|----|------------------------------------|---------------|----------------|-----------------|-----------|-------|--------|-------|-------|-------|------|-----|-------|-------|---|---|---|
| 57 | <i>Bruchus brachialis</i>          | Chrysomelidae | Chrysomeloidea | Cucujiformia    | Polyphaga | Phyto | Open   | Herb  | Medit | Fragm | Warm | Sex | Small | Mobil | 0 | 0 | 0 |
| 58 | <i>Bruchus loti</i>                | Chrysomelidae | Chrysomeloidea | Cucujiformia    | Polyphaga | Phyto | Open   | Herb  | Cont  | Wide  | Neut | Sex | Small | Mobil | 0 | 0 | 0 |
| 59 | <i>Bruchus viciae</i>              | Chrysomelidae | Chrysomeloidea | Cucujiformia    | Polyphaga | Phyto | Open   | Herb  | Medit | Wide  | Warm | Sex | Small | Mobil | 0 | 0 | 0 |
| 60 | <i>Caccobius schreberi</i>         | Scarabaeidae  | Scarabaeoidea  | Scarabaeiformia | Polyphaga | Sapro | Open   | Copro | Temp  | Fragm | Warm | Sex | Med   | Mobil | 0 | 0 | 0 |
| 61 | <i>Calathus fuscipes</i>           | Carabidae     | Caraboidea     | Carabiformia    | Adephaga  | Pred  | Ubiq   | Epig  | Temp  | Wide  | Neut | Sex | Med   | Mobil | 0 | 0 | 0 |
| 62 | <i>Calvia quatuordecimpunctata</i> | Coccinellidae | Cucujoidea     | Cucujiformia    | Polyphaga | Pred  | Forest | Herb  | Temp  | Wide  | Neut | Sex | Med   | Mobil | 0 | 0 | 0 |
| 63 | <i>Cantharis livida</i>            | Cantharidae   | Elateroidea    | Elateriformia   | Polyphaga | Pred  | Ubiq   | Herb  | Temp  | Wide  | Neut | Sex | Med   | Mobil | 0 | 0 | 0 |
| 64 | <i>Cantharis nigricans</i>         | Cantharidae   | Elateroidea    | Elateriformia   | Polyphaga | Pred  | Forest | Herb  | Temp  | Wide  | Neut | Sex | Med   | Mobil | 0 | 0 | 0 |
| 65 | <i>Cantharis rustica</i>           | Cantharidae   | Elateroidea    | Elateriformia   | Polyphaga | Pred  | Ubiq   | Herb  | Temp  | Wide  | Neut | Sex | Med   | Mobil | 0 | 0 | 0 |
| 66 | <i>Carabus cancellatus</i>         | Carabidae     | Caraboidea     | Carabiformia    | Adephaga  | Pred  | Open   | Epig  | Temp  | Wide  | Neut | Sex | Large | Seden | 0 | 0 | 0 |
| 67 | <i>Carabus coriaceus</i>           | Carabidae     | Caraboidea     | Carabiformia    | Adephaga  | Pred  | Forest | Epig  | Temp  | Wide  | Neut | Sex | Large | Seden | 0 | 0 | 0 |
| 68 | <i>Carabus glabratus</i>           | Carabidae     | Caraboidea     | Carabiformia    | Adephaga  | Pred  | Forest | Epig  | Temp  | Wide  | Neut | Sex | Large | Seden | 1 | 0 | 1 |
| 69 | <i>Carabus granulatus</i>          | Carabidae     | Caraboidea     | Carabiformia    | Adephaga  | Pred  | Forest | Epig  | Temp  | Wide  | Neut | Sex | Large | Seden | 0 | 0 | 0 |
| 70 | <i>Carabus hortensis</i>           | Carabidae     | Caraboidea     | Carabiformia    | Adephaga  | Pred  | Forest | Epig  | Temp  | Wide  | Neut | Sex | Large | Seden | 0 | 0 | 0 |
| 71 | <i>Carabus nemoralis</i>           | Carabidae     | Caraboidea     | Carabiformia    | Adephaga  | Pred  | Forest | Epig  | Temp  | Wide  | Neut | Sex | Large | Seden | 0 | 0 | 0 |
| 72 | <i>Carabus violaceus</i>           | Carabidae     | Caraboidea     | Carabiformia    | Adephaga  | Pred  | Forest | Epig  | Temp  | Wide  | Neut | Sex | Large | Seden | 0 | 0 | 0 |
| 73 | <i>Cassida viridis</i>             | Chrysomelidae | Chrysomeloidea | Cucujiformia    | Polyphaga | Phyto | Open   | Herb  | Temp  | Wide  | Neut | Sex | Small | Mobil | 1 | 1 | 0 |
| 74 | <i>Catapion jaffense</i>           | Apionidae     | Curculionoidea | Cucujiformia    | Polyphaga | Phyto | Open   | Herb  | Temp  | Wide  | Neut | Sex | Small | Mobil | 1 | 1 | 1 |
| 75 | <i>Catapion koestlini</i>          | Apionidae     | Curculionoidea | Cucujiformia    | Polyphaga | Phyto | Open   | Herb  | Temp  | Fragm | Neut | Sex | Small | Mobil | 0 | 0 | 0 |
| 76 | <i>Catapion meieri</i>             | Apionidae     | Curculionoidea | Cucujiformia    | Polyphaga | Phyto | Open   | Herb  | Temp  | Wide  | Neut | Sex | Small | Mobil | 1 | 0 | 1 |
| 77 | <i>Catapion pubescens</i>          | Apionidae     | Curculionoidea | Cucujiformia    | Polyphaga | Phyto | Open   | Herb  | Temp  | Wide  | Neut | Sex | Small | Mobil | 0 | 0 | 0 |
| 78 | <i>Catapion seniculus</i>          | Apionidae     | Curculionoidea | Cucujiformia    | Polyphaga | Phyto | Open   | Herb  | Temp  | Wide  | Neut | Sex | Small | Mobil | 1 | 0 | 1 |
| 79 | <i>Centricnemus leucogrammus</i>   | Curculionidae | Curculionoidea | Cucujiformia    | Polyphaga | Phyto | Open   | Herb  | Cont  | Fragm | Warm | Sex | Small | Seden | 0 | 0 | 0 |
| 80 | <i>Cetonia aurata</i>              | Scarabaeidae  | Scarabaeoidea  | Scarabaeiformia | Polyphaga | Phyto | Ubiq   | Xylo  | Temp  | Wide  | Warm | Sex | Med   | Mobil | 0 | 0 | 0 |
| 81 | <i>Ceutorhynchus obstructus</i>    | Curculionidae | Curculionoidea | Cucujiformia    | Polyphaga | Phyto | Open   | Herb  | Temp  | Wide  | Neut | Sex | Small | Mobil | 1 | 1 | 0 |
| 82 | <i>Ceutorhynchus typhae</i>        | Curculionidae | Curculionoidea | Cucujiformia    | Polyphaga | Phyto | Ubiq   | Herb  | Temp  | Wide  | Neut | Sex | Small | Mobil | 1 | 1 | 0 |
| 83 | <i>Cheilotoma musciformis</i>      | Chrysomelidae | Chrysomeloidea | Cucujiformia    | Polyphaga | Phyto | Open   | Herb  | Cont  | Fragm | Warm | Sex | Small | Mobil | 0 | 0 | 0 |
| 84 | <i>Chilocorus renipustulatus</i>   | Coccinellidae | Cucujoidea     | Cucujiformia    | Polyphaga | Pred  | Forest | Herb  | Temp  | Wide  | Neut | Sex | Med   | Mobil | 0 | 0 | 0 |
| 85 | <i>Chlaenius nitidulus</i>         | Carabidae     | Caraboidea     | Carabiformia    | Adephaga  | Pred  | Open   | Hydro | Temp  | Wide  | Neut | Sex | Med   | Mobil | 0 | 0 | 0 |
| 86 | <i>Chlaenius tibialis</i>          | Carabidae     | Caraboidea     | Carabiformia    | Adephaga  | Pred  | Open   | Hydro | Temp  | Wide  | Neut | Sex | Med   | Mobil | 0 | 0 | 0 |
| 87 | <i>Chrysanthia geniculata</i>      | Oedemeridae   | Tenebrionoidea | Cucujiformia    | Polyphaga | Wood  | Forest | Xylo  | Temp  | Fragm | Neut | Sex | Med   | Mobil | 0 | 0 | 0 |
| 88 | <i>Chrysolina herbacea</i>         | Chrysomelidae | Chrysomeloidea | Cucujiformia    | Polyphaga | Phyto | Open   | Herb  | Medit | Wide  | Neut | Sex | Med   | Mobil | 1 | 1 | 0 |
| 89 | <i>Chrysolina polita</i>           | Chrysomelidae | Chrysomeloidea | Cucujiformia    | Polyphaga | Phyto | Open   | Herb  | Temp  | Wide  | Neut | Sex | Med   | Mobil | 0 | 0 | 0 |
| 90 | <i>Chrysolina varians</i>          | Chrysomelidae | Chrysomeloidea | Cucujiformia    | Polyphaga | Phyto | Open   | Herb  | Temp  | Wide  | Neut | Sex | Med   | Mobil | 0 | 0 | 0 |
| 91 | <i>Cicindela hybrida</i>           | Carabidae     | Caraboidea     | Carabiformia    | Adephaga  | Pred  | Open   | Epig  | Temp  | Wide  | Warm | Sex | Med   | Mobil | 0 | 0 | 0 |

|     |                                        |               |                |                 |           |        |        |       |       |       |      |     |       |       |   |   |   |
|-----|----------------------------------------|---------------|----------------|-----------------|-----------|--------|--------|-------|-------|-------|------|-----|-------|-------|---|---|---|
| 92  | <i>Clerus mutillarius</i>              | Cleridae      | Clerioidea     | Cucujiformia    | Polyphaga | Pred   | Ubiq   | Xylo  | Medit | Wide  | Warm | Sex | Med   | Mobil | 0 | 0 | 0 |
| 93  | <i>Clivina collaris</i>                | Carabidae     | Caraboidea     | Carabiformia    | Adephaga  | Pred   | Open   | Hydro | Temp  | Wide  | Neut | Sex | Med   | Mobil | 0 | 0 | 0 |
| 94  | <i>Coccinella quinquepunctata</i>      | Coccinellidae | Cucujoidea     | Cucujiformia    | Polyphaga | Pred   | Ubiq   | Herb  | Temp  | Wide  | Neut | Sex | Med   | Mobil | 0 | 0 | 0 |
| 95  | <i>Coccinella septempunctata</i>       | Coccinellidae | Cucujoidea     | Cucujiformia    | Polyphaga | Pred   | Ubiq   | Herb  | Temp  | Wide  | Neut | Sex | Med   | Mobil | 0 | 0 | 0 |
| 96  | <i>Coccinula quatuordecimpustulata</i> | Coccinellidae | Cucujoidea     | Cucujiformia    | Polyphaga | Pred   | Open   | Herb  | Temp  | Wide  | Warm | Sex | Small | Mobil | 1 | 1 | 0 |
| 97  | <i>Combocerus glaber</i>               | Erotylidae    | Cucujoidea     | Cucujiformia    | Polyphaga | Myceto | Forest | Fungi | Temp  | Wide  | Neut | Sex | Small | Mobil | 1 | 0 | 1 |
| 98  | <i>Coraebus elatus</i>                 | Buprestidae   | Buprestoidea   | Elateriformia   | Polyphaga | Phyto  | Open   | Herb  | Cont  | Fragm | Warm | Sex | Small | Mobil | 0 | 0 | 0 |
| 99  | <i>Crepidodera aurata</i>              | Chrysomelidae | Chrysomeloidea | Cucujiformia    | Polyphaga | Phyto  | Forest | Herb  | Temp  | Wide  | Neut | Sex | Small | Mobil | 1 | 1 | 0 |
| 100 | <i>Crioceris asparagi</i>              | Chrysomelidae | Chrysomeloidea | Cucujiformia    | Polyphaga | Phyto  | Open   | Herb  | Temp  | Wide  | Neut | Sex | Med   | Mobil | 0 | 0 | 0 |
| 101 | <i>Crioceris quatuordecimpunctata</i>  | Chrysomelidae | Chrysomeloidea | Cucujiformia    | Polyphaga | Phyto  | Open   | Herb  | Cont  | Fragm | Warm | Sex | Med   | Mobil | 1 | 1 | 1 |
| 102 | <i>Crioceris quinquepunctata</i>       | Chrysomelidae | Chrysomeloidea | Cucujiformia    | Polyphaga | Phyto  | Open   | Herb  | Cont  | Fragm | Warm | Sex | Med   | Mobil | 1 | 1 | 1 |
| 103 | <i>Cryptocephalus bameuli</i>          | Chrysomelidae | Chrysomeloidea | Cucujiformia    | Polyphaga | Phyto  | Open   | Herb  | Cont  | Wide  | Neut | Sex | Small | Mobil | 0 | 0 | 0 |
| 104 | <i>Cryptocephalus bipunctatus</i>      | Chrysomelidae | Chrysomeloidea | Cucujiformia    | Polyphaga | Phyto  | Ubiq   | Herb  | Temp  | Wide  | Neut | Sex | Med   | Mobil | 0 | 0 | 0 |
| 105 | <i>Cryptocephalus flavipes</i>         | Chrysomelidae | Chrysomeloidea | Cucujiformia    | Polyphaga | Phyto  | Ubiq   | Herb  | Cont  | Wide  | Warm | Sex | Small | Mobil | 0 | 0 | 0 |
| 106 | <i>Cryptocephalus hypochoeridis</i>    | Chrysomelidae | Chrysomeloidea | Cucujiformia    | Polyphaga | Phyto  | Open   | Herb  | Temp  | Wide  | Neut | Sex | Med   | Mobil | 1 | 1 | 0 |
| 107 | <i>Cryptocephalus moraei</i>           | Chrysomelidae | Chrysomeloidea | Cucujiformia    | Polyphaga | Phyto  | Open   | Herb  | Temp  | Wide  | Neut | Sex | Small | Mobil | 0 | 0 | 0 |
| 108 | <i>Cryptocephalus quadripustulatus</i> | Chrysomelidae | Chrysomeloidea | Cucujiformia    | Polyphaga | Phyto  | Forest | Herb  | Temp  | Wide  | Neut | Sex | Small | Mobil | 0 | 0 | 0 |
| 109 | <i>Cryptocephalus sericeus</i>         | Chrysomelidae | Chrysomeloidea | Cucujiformia    | Polyphaga | Phyto  | Open   | Herb  | Cont  | Wide  | Neut | Sex | Med   | Mobil | 0 | 0 | 0 |
| 110 | <i>Cryptocephalus signatifrons</i>     | Chrysomelidae | Chrysomeloidea | Cucujiformia    | Polyphaga | Phyto  | Ubiq   | Herb  | Medit | Wide  | Warm | Sex | Small | Mobil | 0 | 0 | 0 |
| 111 | <i>Cryptocephalus violaceus</i>        | Chrysomelidae | Chrysomeloidea | Cucujiformia    | Polyphaga | Phyto  | Ubiq   | Herb  | Cont  | Wide  | Warm | Sex | Med   | Mobil | 0 | 0 | 0 |
| 112 | <i>Cyanapion afer</i>                  | Apionidae     | Curculionoidea | Cucujiformia    | Polyphaga | Phyto  | Open   | Herb  | Temp  | Fragm | Neut | Sex | Small | Mobil | 1 | 1 | 1 |
| 113 | <i>Cyanapion gnarum</i>                | Apionidae     | Curculionoidea | Cucujiformia    | Polyphaga | Phyto  | Open   | Herb  | Temp  | Fragm | Neut | Sex | Small | Mobil | 0 | 0 | 0 |
| 114 | <i>Cyanapion gyllenhalii</i>           | Apionidae     | Curculionoidea | Cucujiformia    | Polyphaga | Phyto  | Open   | Herb  | Temp  | Wide  | Neut | Sex | Small | Mobil | 1 | 1 | 1 |
| 115 | <i>Cyanapion platalea</i>              | Apionidae     | Curculionoidea | Cucujiformia    | Polyphaga | Phyto  | Open   | Herb  | Temp  | Wide  | Neut | Sex | Small | Mobil | 0 | 0 | 0 |
| 116 | <i>Cyanapion columbinum</i>            | Apionidae     | Curculionoidea | Cucujiformia    | Polyphaga | Phyto  | Open   | Herb  | Temp  | Wide  | Neut | Sex | Small | Mobil | 0 | 0 | 0 |
| 117 | <i>Cyanapion spencii</i>               | Apionidae     | Curculionoidea | Cucujiformia    | Polyphaga | Phyto  | Open   | Herb  | Temp  | Wide  | Neut | Sex | Small | Mobil | 1 | 1 | 1 |
| 118 | <i>Dacne bipustulata</i>               | Erotylidae    | Cucujoidea     | Cucujiformia    | Polyphaga | Myceto | Forest | Fungi | Temp  | Wide  | Neut | Sex | Small | Mobil | 0 | 0 | 0 |
| 119 | <i>Dacne rufifrons</i>                 | Erotylidae    | Cucujoidea     | Cucujiformia    | Polyphaga | Myceto | Forest | Fungi | Temp  | Wide  | Neut | Sex | Small | Mobil | 1 | 1 | 0 |
| 120 | <i>Dalopius marginatus</i>             | Elateridae    | Elateroidea    | Elateriformia   | Polyphaga | Pred   | Ubiq   | Epig  | Temp  | Wide  | Neut | Sex | Med   | Mobil | 0 | 0 | 0 |
| 121 | <i>Dascillus cervinus</i>              | Dascillidae   | Dascilloidea   | Elateriformia   | Polyphaga | Phyto  | Open   | Herb  | Mount | Wide  | Neut | Sex | Med   | Mobil | 0 | 0 | 0 |
| 122 | <i>Dasytes plumbeus</i>                | Dasytidae     | Clerioidea     | Cucujiformia    | Polyphaga | Pred   | Ubiq   | Xylo  | Temp  | Wide  | Neut | Sex | Med   | Mobil | 0 | 0 | 0 |
| 123 | <i>Deporaus betulae</i>                | Rhynchitidae  | Curculionoidea | Cucujiformia    | Polyphaga | Phyto  | Ubiq   | Herb  | Temp  | Wide  | Neut | Sex | Small | Mobil | 0 | 0 | 0 |
| 124 | <i>Dermestes lardarius</i>             | Dermestidae   | Bostrichoidea  | Bostrichiformia | Polyphaga | Sapro  | Ubiq   | Necro | Temp  | Wide  | Neut | Sex | Med   | Mobil | 0 | 0 | 0 |
| 125 | <i>Derocrepis rufipes</i>              | Chrysomelidae | Chrysomeloidea | Cucujiformia    | Polyphaga | Phyto  | Open   | Herb  | Temp  | Wide  | Neut | Sex | Small | Mobil | 0 | 0 | 0 |
| 126 | <i>Dieperis boleti</i>                 | Tenebrionidae | Tenebrionoidea | Cucujiformia    | Polyphaga | Myceto | Forest | Fungi | Temp  | Wide  | Neut | Sex | Med   | Mobil | 0 | 0 | 0 |

|     |                                   |                |                |                 |           |        |        |       |       |       |      |       |       |       |   |   |   |
|-----|-----------------------------------|----------------|----------------|-----------------|-----------|--------|--------|-------|-------|-------|------|-------|-------|-------|---|---|---|
| 127 | <i>Dinoptera collaris</i>         | Cerambycidae   | Chrysomeloidea | Cucujiformia    | Polyphaga | Wood   | Forest | Xylo  | Temp  | Wide  | Neut | Sex   | Med   | Mobil | 0 | 0 | 0 |
| 128 | <i>Dolichosoma lineare</i>        | Dasytidae      | Cleroidea      | Cucujiformia    | Polyphaga | Pred   | Open   | Herb  | Cont  | Wide  | Warm | Sex   | Med   | Mobil | 0 | 0 | 0 |
| 129 | <i>Dorcus parallelipedus</i>      | Lucanidae      | Scarabaeoidea  | Scarabaeiformia | Polyphaga | Wood   | Forest | Xylo  | Medit | Wide  | Warm | Sex   | Large | Mobil | 0 | 0 | 0 |
| 130 | <i>Dromius agilis</i>             | Carabidae      | Caraboidea     | Carabiformia    | Adephaga  | Pred   | Forest | Xylo  | Temp  | Wide  | Neut | Sex   | Med   | Mobil | 1 | 1 | 0 |
| 131 | <i>Dryocoetes autographus</i>     | Curculionidae  | Curculionoidea | Cucujiformia    | Polyphaga | Wood   | Forest | Xylo  | Temp  | Wide  | Neut | Sex   | Small | Mobil | 0 | 0 | 0 |
| 132 | <i>Drypta dentata</i>             | Carabidae      | Caraboidea     | Carabiformia    | Adephaga  | Pred   | Open   | Epig  | Medit | Fragm | Warm | Sex   | Med   | Mobil | 0 | 0 | 0 |
| 133 | <i>Dyschirius digitatus</i>       | Carabidae      | Caraboidea     | Carabiformia    | Adephaga  | Pred   | Open   | Hydro | Temp  | Fragm | Neut | Sex   | Small | Mobil | 0 | 0 | 0 |
| 134 | <i>Elaphropus quadrisignatus</i>  | Carabidae      | Caraboidea     | Carabiformia    | Adephaga  | Pred   | Open   | Hydro | Medit | Wide  | Warm | Sex   | Small | Mobil | 0 | 0 | 0 |
| 135 | <i>Elaphrus aureus</i>            | Carabidae      | Caraboidea     | Carabiformia    | Adephaga  | Pred   | Open   | Hydro | Temp  | Wide  | Neut | Sex   | Med   | Mobil | 0 | 0 | 0 |
| 136 | <i>Elaphrus riparius</i>          | Carabidae      | Caraboidea     | Carabiformia    | Adephaga  | Pred   | Open   | Hydro | Temp  | Wide  | Neut | Sex   | Med   | Mobil | 0 | 0 | 0 |
| 137 | <i>Etorofus pubescens</i>         | Cerambycidae   | Chrysomeloidea | Cucujiformia    | Polyphaga | Wood   | Forest | Xylo  | Temp  | Wide  | Neut | Sex   | Med   | Mobil | 1 | 1 | 0 |
| 138 | <i>Euoniticellus fulvus</i>       | Scarabaeidae   | Scarabaeoidea  | Scarabaeiformia | Polyphaga | Sapro  | Open   | Copro | Cont  | Fragm | Warm | Sex   | Med   | Mobil | 0 | 0 | 0 |
| 139 | <i>Eusomus ovulum</i>             | Curculionidae  | Curculionoidea | Cucujiformia    | Polyphaga | Phyto  | Open   | Herb  | Cont  | Wide  | Warm | Parth | Med   | Seden | 1 | 1 | 0 |
| 140 | <i>Eutrichapion melancholicum</i> | Apionidae      | Curculionoidea | Cucujiformia    | Polyphaga | Phyto  | Open   | Herb  | Temp  | Wide  | Neut | Sex   | Small | Mobil | 0 | 0 | 0 |
| 141 | <i>Eutrichapion viciae</i>        | Apionidae      | Curculionoidea | Cucujiformia    | Polyphaga | Phyto  | Open   | Herb  | Temp  | Wide  | Neut | Sex   | Small | Mobil | 0 | 0 | 0 |
| 142 | <i>Exochomus quadripustulatus</i> | Coccinellidae  | Cucujoidea     | Cucujiformia    | Polyphaga | Pred   | Forest | Herb  | Temp  | Wide  | Neut | Sex   | Med   | Mobil | 0 | 0 | 0 |
| 143 | <i>Galeruca tanacetii</i>         | Chrysomelidae  | Chrysomeloidea | Cucujiformia    | Polyphaga | Phyto  | Open   | Herb  | Temp  | Wide  | Neut | Sex   | Med   | Mobil | 0 | 0 | 0 |
| 144 | <i>Galerucella tenella</i>        | Chrysomelidae  | Chrysomeloidea | Cucujiformia    | Polyphaga | Phyto  | Open   | Herb  | Temp  | Wide  | Neut | Sex   | Small | Mobil | 0 | 0 | 0 |
| 145 | <i>Gnaptor spinimanus</i>         | Tenebrionidae  | Tenebrionoidea | Cucujiformia    | Polyphaga | Phyto  | Open   | Epig  | Cont  | Fragm | Warm | Sex   | Large | Seden | 0 | 0 | 0 |
| 146 | <i>Harpalus affinis</i>           | Carabidae      | Caraboidea     | Carabiformia    | Adephaga  | Pred   | Open   | Epig  | Temp  | Wide  | Neut | Sex   | Med   | Mobil | 0 | 0 | 0 |
| 147 | <i>Harpalus rufipes</i>           | Carabidae      | Caraboidea     | Carabiformia    | Adephaga  | Pred   | Open   | Epig  | Temp  | Wide  | Neut | Sex   | Med   | Mobil | 0 | 0 | 0 |
| 148 | <i>Hippodamia variegata</i>       | Coccinellidae  | Cucujoidea     | Cucujiformia    | Polyphaga | Pred   | Open   | Herb  | Temp  | Wide  | Neut | Sex   | Med   | Mobil | 0 | 0 | 0 |
| 149 | <i>Hylobius abietis</i>           | Curculionidae  | Curculionoidea | Cucujiformia    | Polyphaga | Wood   | Forest | Herb  | Temp  | Wide  | Neut | Sex   | Med   | Mobil | 1 | 1 | 0 |
| 150 | <i>Hylotrupes bajulus</i>         | Cerambycidae   | Chrysomeloidea | Cucujiformia    | Polyphaga | Wood   | Ubiq   | Xylo  | Temp  | Wide  | Neut | Sex   | Med   | Mobil | 0 | 0 | 0 |
| 151 | <i>Ips typographus</i>            | Curculionidae  | Curculionoidea | Cucujiformia    | Polyphaga | Wood   | Forest | Xylo  | Temp  | Wide  | Neut | Sex   | Small | Mobil | 0 | 0 | 0 |
| 152 | <i>Kateretes pedicularius</i>     | Nitidulidae    | Cucujoidea     | Cucujiformia    | Polyphaga | Phyto  | Open   | Herb  | Temp  | Wide  | Neut | Sex   | Small | Mobil | 0 | 0 | 0 |
| 153 | <i>Lagria hirta</i>               | Tenebrionidae  | Tenebrionoidea | Cucujiformia    | Polyphaga | Phyto  | Ubiq   | Herb  | Temp  | Wide  | Neut | Sex   | Med   | Mobil | 1 | 1 | 0 |
| 154 | <i>Litargus connexus</i>          | Mycetophagidae | Tenebrionoidea | Cucujiformia    | Polyphaga | Myceto | Forest | Fungi | Temp  | Wide  | Neut | Sex   | Small | Mobil | 0 | 0 | 0 |
| 155 | <i>Lixus filiformis</i>           | Curculionidae  | Curculionoidea | Cucujiformia    | Polyphaga | Phyto  | Open   | Herb  | Temp  | Fragm | Warm | Sex   | Med   | Seden | 0 | 0 | 0 |
| 156 | <i>Lochmaea caprea</i>            | Chrysomelidae  | Chrysomeloidea | Cucujiformia    | Polyphaga | Phyto  | Ubiq   | Herb  | Temp  | Wide  | Neut | Sex   | Med   | Mobil | 0 | 0 | 0 |
| 157 | <i>Longitarsus exsoletus</i>      | Chrysomelidae  | Chrysomeloidea | Cucujiformia    | Polyphaga | Phyto  | Ubiq   | Herb  | Temp  | Wide  | Neut | Sex   | Small | Mobil | 0 | 0 | 0 |
| 158 | <i>Longitarsus nasturtii</i>      | Chrysomelidae  | Chrysomeloidea | Cucujiformia    | Polyphaga | Phyto  | Ubiq   | Herb  | Temp  | Wide  | Neut | Sex   | Small | Mobil | 0 | 0 | 0 |
| 159 | <i>Loricera pilicornis</i>        | Carabidae      | Caraboidea     | Carabiformia    | Adephaga  | Pred   | Open   | Hydro | Temp  | Wide  | Neut | Sex   | Med   | Mobil | 0 | 0 | 0 |
| 160 | <i>Luperus flavipes</i>           | Chrysomelidae  | Chrysomeloidea | Cucujiformia    | Polyphaga | Phyto  | Forest | Herb  | Temp  | Wide  | Neut | Sex   | Small | Mobil | 1 | 1 | 0 |
| 161 | <i>Luperus luperus</i>            | Chrysomelidae  | Chrysomeloidea | Cucujiformia    | Polyphaga | Phyto  | Forest | Herb  | Temp  | Wide  | Neut | Sex   | Small | Mobil | 1 | 1 | 0 |

|     |                                      |                |                |                  |           |        |        |       |       |       |      |     |       |       |   |   |   |
|-----|--------------------------------------|----------------|----------------|------------------|-----------|--------|--------|-------|-------|-------|------|-----|-------|-------|---|---|---|
| 162 | <i>Lygistopterus sanguineus</i>      | Lycidae        | Elateroidea    | Elateriformia    | Polyphaga | Sapro  | Forest | Xylo  | Temp  | Wide  | Neut | Sex | Med   | Mobil | 0 | 0 | 0 |
| 163 | <i>Mecinus pascuorum</i>             | Curculionidae  | Curculionoidea | Cucujiformia     | Polyphaga | Phyto  | Open   | Herb  | Temp  | Wide  | Neut | Sex | Small | Mobil | 1 | 0 | 1 |
| 164 | <i>Melolontha melolontha</i>         | Scarabaeidae   | Scarabaeoidea  | Scarabaeiformia  | Polyphaga | Phyto  | Ubiq   | Herb  | Temp  | Wide  | Neut | Sex | Large | Mobil | 0 | 0 | 0 |
| 165 | <i>Metacantharis discoidea</i>       | Cantharidae    | Elateroidea    | Elateriformia    | Polyphaga | Pred   | Forest | Herb  | Temp  | Wide  | Neut | Sex | Med   | Mobil | 0 | 0 | 0 |
| 166 | <i>Monochamus galloprovincialis</i>  | Cerambycidae   | Chrysomeloidea | Cucujiformia     | Polyphaga | Wood   | Forest | Xylo  | Temp  | Wide  | Neut | Sex | Large | Mobil | 0 | 0 | 0 |
| 167 | <i>Monochamus sartor</i>             | Cerambycidae   | Chrysomeloidea | Cucujiformia     | Polyphaga | Wood   | Forest | Xylo  | Mount | Wide  | Neut | Sex | Large | Mobil | 1 | 1 | 1 |
| 168 | <i>Monochamus sutor</i>              | Cerambycidae   | Chrysomeloidea | Cucujiformia     | Polyphaga | Wood   | Forest | Xylo  | Mount | Wide  | Neut | Sex | Large | Mobil | 0 | 0 | 0 |
| 169 | <i>Mordella brachyura</i>            | Mordellidae    | Tenebrionoidea | Cucujiformia     | Polyphaga | Wood   | Ubiq   | Xylo  | Temp  | Wide  | Neut | Sex | Med   | Mobil | 0 | 0 | 0 |
| 170 | <i>Mordella holomelaena</i>          | Mordellidae    | Tenebrionoidea | Cucujiformia     | Polyphaga | Wood   | Forest | Xylo  | Temp  | Wide  | Neut | Sex | Med   | Mobil | 0 | 0 | 0 |
| 171 | <i>Musaria affinis</i>               | Cerambycidae   | Chrysomeloidea | Cucujiformia     | Polyphaga | Phyto  | Ubiq   | Herb  | Temp  | Wide  | Neut | Sex | Med   | Mobil | 0 | 0 | 0 |
| 172 | <i>Mycetophagus ater</i>             | Mycetophagidae | Tenebrionoidea | Cucujiformia     | Polyphaga | Myceto | Forest | Fungi | Temp  | Wide  | Neut | Sex | Med   | Mobil | 0 | 0 | 0 |
| 173 | <i>Mycetophagus multipunctatus</i>   | Mycetophagidae | Tenebrionoidea | Cucujiformia     | Polyphaga | Myceto | Forest | Fungi | Temp  | Wide  | Neut | Sex | Med   | Mobil | 0 | 0 | 0 |
| 174 | <i>Mycetophagus piceus</i>           | Mycetophagidae | Tenebrionoidea | Cucujiformia     | Polyphaga | Myceto | Forest | Fungi | Temp  | Wide  | Neut | Sex | Med   | Mobil | 0 | 0 | 0 |
| 175 | <i>Mycetophagus quadripustulatus</i> | Mycetophagidae | Tenebrionoidea | Cucujiformia     | Polyphaga | Myceto | Forest | Fungi | Temp  | Wide  | Neut | Sex | Med   | Mobil | 0 | 0 | 0 |
| 176 | <i>Myrrha octodecimguttata</i>       | Coccinellidae  | Cucujoidea     | Cucujiformia     | Polyphaga | Pred   | Forest | Herb  | Temp  | Wide  | Neut | Sex | Med   | Mobil | 1 | 1 | 0 |
| 177 | <i>Neatus picipes</i>                | Tenebrionidae  | Tenebrionoidea | Cucujiformia     | Polyphaga | Sapro  | Forest | Xylo  | Temp  | Wide  | Neut | Sex | Med   | Mobil | 0 | 0 | 0 |
| 178 | <i>Nebria picicornis</i>             | Carabidae      | Caraboidea     | Carabiformia     | Adephaga  | Pred   | Open   | Hydro | Mount | Fragm | Neut | Sex | Med   | Mobil | 1 | 1 | 0 |
| 179 | <i>Neocoenorhinus germanicus</i>     | Rhynchitidae   | Curculionoidea | Cucujiformia     | Polyphaga | Phyto  | Open   | Herb  | Temp  | Wide  | Neut | Sex | Small | Mobil | 1 | 0 | 1 |
| 180 | <i>Nedyus quadrimaculatus</i>        | Curculionidae  | Curculionoidea | Cucujiformia     | Polyphaga | Phyto  | Ubiq   | Herb  | Temp  | Wide  | Neut | Sex | Small | Mobil | 1 | 1 | 0 |
| 181 | <i>Nicrophorus vespilloides</i>      | Silphidae      | Staphylinoidea | Staphyliniformia | Polyphaga | Sapro  | Ubiq   | Necro | Temp  | Wide  | Neut | Sex | Med   | Mobil | 1 | 1 | 0 |
| 182 | <i>Nivellia sanguinosa</i>           | Cerambycidae   | Chrysomeloidea | Cucujiformia     | Polyphaga | Wood   | Forest | Xylo  | Mount | Fragm | Neut | Sex | Med   | Mobil | 0 | 0 | 0 |
| 183 | <i>Notiophilus biguttatus</i>        | Carabidae      | Caraboidea     | Carabiformia     | Adephaga  | Pred   | Forest | Epig  | Temp  | Wide  | Neut | Sex | Small | Mobil | 0 | 0 | 0 |
| 184 | <i>Notoxus monoceros</i>             | Anthicidae     | Tenebrionoidea | Cucujiformia     | Polyphaga | Sapro  | Ubiq   | Herb  | Temp  | Wide  | Neut | Sex | Small | Mobil | 1 | 1 | 1 |
| 185 | <i>Obrium brunneum</i>               | Cerambycidae   | Chrysomeloidea | Cucujiformia     | Polyphaga | Wood   | Forest | Xylo  | Temp  | Wide  | Neut | Sex | Small | Mobil | 0 | 0 | 0 |
| 186 | <i>Ocyopus olens</i>                 | Staphylinidae  | Staphylinoidea | Staphyliniformia | Polyphaga | Pred   | Forest | Epig  | Temp  | Wide  | Neut | Sex | Large | Mobil | 0 | 0 | 0 |
| 187 | <i>Oedemera femorata</i>             | Oedemeridae    | Tenebrionoidea | Cucujiformia     | Polyphaga | Phyto  | Open   | Herb  | Temp  | Wide  | Neut | Sex | Med   | Mobil | 0 | 0 | 0 |
| 188 | <i>Oedemera flavipes</i>             | Oedemeridae    | Tenebrionoidea | Cucujiformia     | Polyphaga | Phyto  | Open   | Herb  | Medit | Wide  | Warm | Sex | Med   | Mobil | 0 | 0 | 0 |
| 189 | <i>Oenopia conglobata</i>            | Coccinellidae  | Cucujoidea     | Cucujiformia     | Polyphaga | Pred   | Forest | Herb  | Temp  | Wide  | Neut | Sex | Small | Mobil | 0 | 0 | 0 |
| 190 | <i>Oiceoptoma thoracica</i>          | Silphidae      | Staphylinoidea | Staphyliniformia | Polyphaga | Sapro  | Forest | Necro | Temp  | Wide  | Neut | Sex | Med   | Mobil | 1 | 1 | 0 |
| 191 | <i>Omalisus fontisbellaquaei</i>     | Omalisidae     | Elateroidea    | Elateriformia    | Polyphaga | Pred   | Open   | Herb  | Temp  | Wide  | Neut | Sex | Med   | Mobil | 0 | 0 | 0 |
| 192 | <i>Omonadus floralis</i>             | Anthicidae     | Tenebrionoidea | Cucujiformia     | Polyphaga | Sapro  | Open   | Herb  | Temp  | Wide  | Neut | Sex | Small | Mobil | 0 | 0 | 0 |
| 193 | <i>Omophron limbatum</i>             | Carabidae      | Caraboidea     | Carabiformia     | Adephaga  | Pred   | Open   | Hydro | Temp  | Wide  | Neut | Sex | Med   | Mobil | 0 | 0 | 0 |
| 194 | <i>Onthophagus fracticornis</i>      | Scarabaeidae   | Scarabaeoidea  | Scarabaeiformia  | Polyphaga | Sapro  | Open   | Copro | Temp  | Wide  | Neut | Sex | Med   | Mobil | 1 | 1 | 0 |
| 195 | <i>Onthophagus ovatus</i>            | Scarabaeidae   | Scarabaeoidea  | Scarabaeiformia  | Polyphaga | Sapro  | Open   | Copro | Temp  | Wide  | Warm | Sex | Med   | Mobil | 0 | 0 | 0 |
| 196 | <i>Onthophagus ruficapillus</i>      | Scarabaeidae   | Scarabaeoidea  | Scarabaeiformia  | Polyphaga | Sapro  | Open   | Copro | Temp  | Wide  | Neut | Sex | Med   | Mobil | 1 | 1 | 0 |

|     |                                   |               |                |                  |           |       |        |       |       |       |      |       |       |       |   |   |   |
|-----|-----------------------------------|---------------|----------------|------------------|-----------|-------|--------|-------|-------|-------|------|-------|-------|-------|---|---|---|
| 197 | <i>Onthophagus similis</i>        | Scarabaeidae  | Scarabaeoidea  | Scarabaeiformia  | Polyphaga | Sapro | Open   | Copro | Cont  | Fragm | Warm | Sex   | Med   | Mobil | 1 | 1 | 0 |
| 198 | <i>Onthophagus taurus</i>         | Scarabaeidae  | Scarabaeoidea  | Scarabaeiformia  | Polyphaga | Sapro | Open   | Copro | Cont  | Fragm | Warm | Sex   | Med   | Mobil | 1 | 1 | 0 |
| 199 | <i>Ophonus laticollis</i>         | Carabidae     | Caraboidea     | Carabiformia     | Adephaga  | Pred  | Open   | Epig  | Temp  | Wide  | Neut | Sex   | Med   | Mobil | 0 | 0 | 0 |
| 200 | <i>Otiorhynchus perdix</i>        | Curculionidae | Curculionoidea | Cucujiformia     | Polyphaga | Phyto | Forest | Herb  | Mount | Fragm | Neut | Parth | Med   | Seden | 0 | 0 | 0 |
| 201 | <i>Otiorhynchus riessi</i>        | Curculionidae | Curculionoidea | Cucujiformia     | Polyphaga | Phyto | Forest | Herb  | Mount | Fragm | Neut | Sex   | Med   | Seden | 0 | 0 | 0 |
| 202 | <i>Oulema gallaeciana</i>         | Chrysomelidae | Chrysomeloidea | Cucujiformia     | Polyphaga | Phyto | Open   | Herb  | Temp  | Wide  | Neut | Sex   | Small | Mobil | 0 | 0 | 0 |
| 203 | <i>Oxymirus cursor</i>            | Cerambycidae  | Chrysomeloidea | Cucujiformia     | Polyphaga | Wood  | Forest | Xylo  | Temp  | Wide  | Neut | Sex   | Large | Mobil | 0 | 0 | 0 |
| 204 | <i>Oxythyrea funesta</i>          | Scarabaeidae  | Scarabaeoidea  | Scarabaeiformia  | Polyphaga | Phyto | Open   | Herb  | Cont  | Fragm | Warm | Sex   | Med   | Mobil | 0 | 0 | 0 |
| 205 | <i>Pachyta quadrimaculata</i>     | Cerambycidae  | Chrysomeloidea | Cucujiformia     | Polyphaga | Wood  | Forest | Epig  | Temp  | Wide  | Neut | Sex   | Med   | Mobil | 1 | 1 | 0 |
| 206 | <i>Pachytodes cerambyciformis</i> | Cerambycidae  | Chrysomeloidea | Cucujiformia     | Polyphaga | Wood  | Forest | Xylo  | Temp  | Wide  | Neut | Sex   | Med   | Mobil | 0 | 0 | 0 |
| 207 | <i>Paederidus rubrothoracicus</i> | Staphylinidae | Staphylinidea  | Staphyliniformia | Polyphaga | Pred  | Open   | Hydro | Temp  | Wide  | Neut | Sex   | Med   | Mobil | 0 | 0 | 0 |
| 208 | <i>Paederidus ruficollis</i>      | Staphylinidae | Staphylinidea  | Staphyliniformia | Polyphaga | Pred  | Open   | Hydro | Temp  | Wide  | Neut | Sex   | Med   | Mobil | 1 | 1 | 0 |
| 209 | <i>Paederus caligatus</i>         | Staphylinidae | Staphylinidea  | Staphyliniformia | Polyphaga | Pred  | Open   | Hydro | Temp  | Wide  | Neut | Sex   | Med   | Mobil | 0 | 0 | 0 |
| 210 | <i>Paederus limnophilus</i>       | Staphylinidae | Staphylinidea  | Staphyliniformia | Polyphaga | Pred  | Open   | Hydro | Temp  | Wide  | Neut | Sex   | Med   | Mobil | 1 | 1 | 0 |
| 211 | <i>Paederus litoralis</i>         | Staphylinidae | Staphylinidea  | Staphyliniformia | Polyphaga | Pred  | Open   | Hydro | Temp  | Wide  | Neut | Sex   | Med   | Mobil | 1 | 1 | 0 |
| 212 | <i>Paederus riparius</i>          | Staphylinidae | Staphylinidea  | Staphyliniformia | Polyphaga | Pred  | Open   | Hydro | Temp  | Wide  | Neut | Sex   | Med   | Mobil | 1 | 1 | 1 |
| 213 | <i>Paophilus afflatus</i>         | Curculionidae | Curculionoidea | Cucujiformia     | Polyphaga | Phyto | Open   | Herb  | Temp  | Fragm | Warm | Sex   | Small | Seden | 1 | 1 | 0 |
| 214 | <i>Paradromius linearis</i>       | Carabidae     | Caraboidea     | Carabiformia     | Adephaga  | Pred  | Open   | Epig  | Cont  | Wide  | Warm | Sex   | Med   | Mobil | 0 | 0 | 0 |
| 215 | <i>Parafoucartia squamulata</i>   | Curculionidae | Curculionoidea | Cucujiformia     | Polyphaga | Phyto | Open   | Herb  | Temp  | Wide  | Warm | Sex   | Small | Seden | 1 | 1 | 0 |
| 216 | <i>Paranchus albipes</i>          | Carabidae     | Caraboidea     | Carabiformia     | Adephaga  | Pred  | Open   | Hydro | Temp  | Wide  | Neut | Sex   | Med   | Mobil | 0 | 0 | 0 |
| 217 | <i>Perileptus areolatus</i>       | Carabidae     | Caraboidea     | Carabiformia     | Adephaga  | Pred  | Open   | Hydro | Temp  | Wide  | Neut | Sex   | Small | Mobil | 0 | 0 | 0 |
| 218 | <i>Phosphuga atrata</i>           | Silphidae     | Staphylinidea  | Staphyliniformia | Polyphaga | Pred  | Ubiq   | Epig  | Temp  | Wide  | Neut | Sex   | Med   | Mobil | 0 | 0 | 0 |
| 219 | <i>Phyllobius brevis</i>          | Curculionidae | Curculionoidea | Cucujiformia     | Polyphaga | Phyto | Open   | Herb  | Temp  | Wide  | Neut | Sex   | Small | Mobil | 0 | 0 | 0 |
| 220 | <i>Phyllobius glaucus</i>         | Curculionidae | Curculionoidea | Cucujiformia     | Polyphaga | Phyto | Forest | Herb  | Temp  | Wide  | Neut | Sex   | Med   | Mobil | 1 | 1 | 1 |
| 221 | <i>Phyllobius maculicornis</i>    | Curculionidae | Curculionoidea | Cucujiformia     | Polyphaga | Phyto | Ubiq   | Herb  | Temp  | Wide  | Neut | Sex   | Small | Mobil | 1 | 1 | 1 |
| 222 | <i>Phyllopertha horticola</i>     | Scarabaeidae  | Scarabaeoidea  | Scarabaeiformia  | Polyphaga | Phyto | Ubiq   | Herb  | Temp  | Wide  | Neut | Sex   | Med   | Mobil | 0 | 0 | 0 |
| 223 | <i>Phyllotreta christinae</i>     | Chrysomelidae | Chrysomeloidea | Cucujiformia     | Polyphaga | Phyto | Open   | Herb  | Medit | Fragm | Neut | Sex   | Small | Mobil | 0 | 0 | 0 |
| 224 | <i>Phymatodes testaceus</i>       | Cerambycidae  | Chrysomeloidea | Cucujiformia     | Polyphaga | Wood  | Forest | Xylo  | Temp  | Wide  | Neut | Sex   | Med   | Mobil | 0 | 0 | 0 |
| 225 | <i>Pidonia lurida</i>             | Cerambycidae  | Chrysomeloidea | Cucujiformia     | Polyphaga | Wood  | Forest | Xylo  | Mount | Wide  | Neut | Sex   | Med   | Mobil | 0 | 0 | 0 |
| 226 | <i>Pityogenes chalcographus</i>   | Curculionidae | Curculionoidea | Cucujiformia     | Polyphaga | Wood  | Forest | Xylo  | Temp  | Wide  | Neut | Sex   | Small | Mobil | 1 | 1 | 0 |
| 227 | <i>Plagionotus detritus</i>       | Cerambycidae  | Chrysomeloidea | Cucujiformia     | Polyphaga | Wood  | Forest | Xylo  | Temp  | Wide  | Neut | Sex   | Med   | Mobil | 0 | 0 | 0 |
| 228 | <i>Platynus assimilis</i>         | Carabidae     | Caraboidea     | Carabiformia     | Adephaga  | Pred  | Forest | Epig  | Temp  | Wide  | Neut | Sex   | Med   | Mobil | 0 | 0 | 0 |
| 229 | <i>Poecilus versicolor</i>        | Carabidae     | Caraboidea     | Carabiformia     | Adephaga  | Pred  | Open   | Epig  | Temp  | Wide  | Neut | Sex   | Med   | Mobil | 0 | 0 | 0 |
| 230 | <i>Polydrusus mollis</i>          | Curculionidae | Curculionoidea | Cucujiformia     | Polyphaga | Phyto | Ubiq   | Herb  | Temp  | Wide  | Neut | Parth | Med   | Mobil | 1 | 1 | 1 |
| 231 | <i>Polydrusus inustus</i>         | Curculionidae | Curculionoidea | Cucujiformia     | Polyphaga | Phyto | Open   | Herb  | Cont  | Fragm | Warm | Parth | Small | Seden | 1 | 1 | 0 |

|     |                                      |               |                |               |           |        |        |       |       |       |      |     |       |       |   |   |   |
|-----|--------------------------------------|---------------|----------------|---------------|-----------|--------|--------|-------|-------|-------|------|-----|-------|-------|---|---|---|
| 232 | <i>Prionus coriarius</i>             | Cerambycidae  | Chrysomeloidea | Cucujiformia  | Polyphaga | Wood   | Forest | Epig  | Temp  | Wide  | Neut | Sex | Med   | Mobil | 0 | 0 | 0 |
| 233 | <i>Propylea quatuordecimpunctata</i> | Coccinellidae | Cucujoidea     | Cucujiformia  | Polyphaga | Pred   | Ubiq   | Herb  | Temp  | Wide  | Neut | Sex | Small | Mobil | 0 | 0 | 0 |
| 234 | <i>Pseudomechoris aethiops</i>       | Rhynchitidae  | Curculionoidea | Cucujiformia  | Polyphaga | Phyto  | Open   | Herb  | Medit | Fragm | Warm | Sex | Small | Mobil | 0 | 0 | 0 |
| 235 | <i>Pseudoperapion ergenense</i>      | Apionidae     | Curculionoidea | Cucujiformia  | Polyphaga | Phyto  | Open   | Herb  | Temp  | Wide  | Neut | Sex | Small | Mobil | 1 | 0 | 1 |
| 236 | <i>Pseudovadonia livida</i>          | Cerambycidae  | Chrysomeloidea | Cucujiformia  | Polyphaga | Myceto | Open   | Fungi | Temp  | Wide  | Neut | Sex | Med   | Mobil | 0 | 0 | 0 |
| 237 | <i>Psyllobora vigintiduopunctata</i> | Coccinellidae | Cucujoidea     | Cucujiformia  | Polyphaga | Myceto | Ubiq   | Fungi | Temp  | Wide  | Neut | Sex | Small | Mobil | 1 | 1 | 0 |
| 238 | <i>Pterostichus melanarius</i>       | Carabidae     | Caraboidea     | Carabiformia  | Adephaga  | Pred   | Ubiq   | Epig  | Temp  | Wide  | Neut | Sex | Med   | Mobil | 0 | 0 | 0 |
| 239 | <i>Pterostichus niger</i>            | Carabidae     | Caraboidea     | Carabiformia  | Adephaga  | Pred   | Forest | Epig  | Temp  | Wide  | Neut | Sex | Large | Mobil | 0 | 0 | 0 |
| 240 | <i>Pterostichus oblongopunctatus</i> | Carabidae     | Caraboidea     | Carabiformia  | Adephaga  | Pred   | Forest | Epig  | Temp  | Wide  | Neut | Sex | Med   | Mobil | 0 | 0 | 0 |
| 241 | <i>Pyrochroa coccinea</i>            | Pyrochroidae  | Tenebrionoidea | Cucujiformia  | Polyphaga | Pred   | Forest | Xylo  | Temp  | Wide  | Neut | Sex | Med   | Mobil | 0 | 0 | 0 |
| 242 | <i>Pyrrhidium sanguineum</i>         | Cerambycidae  | Chrysomeloidea | Cucujiformia  | Polyphaga | Wood   | Forest | Xylo  | Temp  | Wide  | Neut | Sex | Med   | Mobil | 0 | 0 | 0 |
| 243 | <i>Pytho depressus</i>               | Pythidae      | Tenebrionoidea | Cucujiformia  | Polyphaga | Wood   | Forest | Xylo  | Temp  | Wide  | Neut | Sex | Med   | Mobil | 0 | 0 | 0 |
| 244 | <i>Rhagium inquisitor</i>            | Cerambycidae  | Chrysomeloidea | Cucujiformia  | Polyphaga | Wood   | Forest | Xylo  | Temp  | Wide  | Neut | Sex | Med   | Mobil | 0 | 0 | 0 |
| 245 | <i>Rhagium mordax</i>                | Cerambycidae  | Chrysomeloidea | Cucujiformia  | Polyphaga | Wood   | Forest | Xylo  | Temp  | Wide  | Neut | Sex | Large | Mobil | 0 | 0 | 0 |
| 246 | <i>Rhagium sycophanta</i>            | Cerambycidae  | Chrysomeloidea | Cucujiformia  | Polyphaga | Wood   | Forest | Xylo  | Temp  | Wide  | Warm | Sex | Med   | Mobil | 0 | 0 | 0 |
| 247 | <i>Rhagonycha fulva</i>              | Cantharidae   | Elateroidea    | Elateriformia | Polyphaga | Pred   | Ubiq   | Herb  | Temp  | Wide  | Neut | Sex | Med   | Mobil | 0 | 0 | 0 |
| 248 | <i>Rhagonycha lignosa</i>            | Cantharidae   | Elateroidea    | Elateriformia | Polyphaga | Pred   | Forest | Herb  | Temp  | Wide  | Neut | Sex | Med   | Mobil | 0 | 0 | 0 |
| 249 | <i>Rhagonycha limbata</i>            | Cantharidae   | Elateroidea    | Elateriformia | Polyphaga | Pred   | Ubiq   | Herb  | Temp  | Wide  | Neut | Sex | Med   | Mobil | 0 | 0 | 0 |
| 250 | <i>Rhinusa tetra</i>                 | Curculionidae | Curculionoidea | Cucujiformia  | Polyphaga | Phyto  | Open   | Herb  | Temp  | Wide  | Neut | Sex | Small | Mobil | 1 | 0 | 1 |
| 251 | <i>Rhyzobius chrysomeloides</i>      | Coccinellidae | Cucujoidea     | Cucujiformia  | Polyphaga | Pred   | Forest | Herb  | Temp  | Wide  | Neut | Sex | Small | Mobil | 0 | 0 | 0 |
| 252 | <i>Rusticoelytus rusticus</i>        | Cerambycidae  | Chrysomeloidea | Cucujiformia  | Polyphaga | Wood   | Forest | Xylo  | Temp  | Wide  | Neut | Sex | Med   | Mobil | 0 | 0 | 0 |
| 253 | <i>Rutpela maculata</i>              | Cerambycidae  | Chrysomeloidea | Cucujiformia  | Polyphaga | Wood   | Forest | Xylo  | Temp  | Wide  | Neut | Sex | Large | Mobil | 0 | 0 | 0 |
| 254 | <i>Salpingus ruficollis</i>          | Salpingidae   | Tenebrionoidea | Cucujiformia  | Polyphaga | Pred   | Forest | Xylo  | Temp  | Wide  | Neut | Sex | Small | Mobil | 0 | 0 | 0 |
| 255 | <i>Saperda scalaris</i>              | Cerambycidae  | Chrysomeloidea | Cucujiformia  | Polyphaga | Wood   | Forest | Xylo  | Temp  | Wide  | Neut | Sex | Med   | Mobil | 0 | 0 | 0 |
| 256 | <i>Schizotus pectinicornis</i>       | Pyrochroidae  | Tenebrionoidea | Cucujiformia  | Polyphaga | Pred   | Forest | Xylo  | Temp  | Wide  | Neut | Sex | Med   | Mobil | 0 | 0 | 0 |
| 257 | <i>Sciaphobus rubi</i>               | Curculionidae | Curculionoidea | Cucujiformia  | Polyphaga | Phyto  | Open   | Herb  | Temp  | Wide  | Warm | Sex | Small | Seden | 1 | 0 | 1 |
| 258 | <i>Scymnus nigrinus</i>              | Coccinellidae | Cucujoidea     | Cucujiformia  | Polyphaga | Pred   | Forest | Herb  | Temp  | Wide  | Neut | Sex | Small | Mobil | 0 | 0 | 0 |
| 259 | <i>Serropalpus barbatus</i>          | Melandryidae  | Tenebrionoidea | Cucujiformia  | Polyphaga | Wood   | Forest | Xylo  | Temp  | Wide  | Neut | Sex | Large | Mobil | 0 | 0 | 0 |
| 260 | <i>Sibinia pellucens</i>             | Curculionidae | Curculionoidea | Cucujiformia  | Polyphaga | Phyto  | Open   | Herb  | Temp  | Wide  | Neut | Sex | Small | Mobil | 1 | 1 | 0 |
| 261 | <i>Silis nitidula</i>                | Cantharidae   | Elateroidea    | Elateriformia | Polyphaga | Pred   | Ubiq   | Herb  | Temp  | Wide  | Neut | Sex | Med   | Mobil | 0 | 0 | 0 |
| 262 | <i>Sitona suturalis</i>              | Curculionidae | Curculionoidea | Cucujiformia  | Polyphaga | Phyto  | Open   | Herb  | Temp  | Wide  | Neut | Sex | Small | Mobil | 1 | 0 | 1 |
| 263 | <i>Sitona sulcifrons</i>             | Curculionidae | Curculionoidea | Cucujiformia  | Polyphaga | Phyto  | Open   | Herb  | Temp  | Wide  | Neut | Sex | Small | Mobil | 0 | 0 | 0 |
| 264 | <i>Smaragdina affinis</i>            | Chrysomelidae | Chrysomeloidea | Cucujiformia  | Polyphaga | Phyto  | Open   | Herb  | Temp  | Wide  | Neut | Sex | Small | Mobil | 0 | 0 | 0 |
| 265 | <i>Spermophagus sericeus</i>         | Chrysomelidae | Chrysomeloidea | Cucujiformia  | Polyphaga | Phyto  | Open   | Herb  | Temp  | Wide  | Neut | Sex | Small | Mobil | 0 | 0 | 0 |
| 266 | <i>Sphidus dubius</i>                | Sphindidae    | Cucujoidea     | Cucujiformia  | Polyphaga | Myceto | Forest | Fungi | Temp  | Wide  | Neut | Sex | Med   | Mobil | 0 | 0 | 0 |

|     |                                   |               |                 |                  |           |        |        |       |       |       |      |       |       |       |   |   |   |
|-----|-----------------------------------|---------------|-----------------|------------------|-----------|--------|--------|-------|-------|-------|------|-------|-------|-------|---|---|---|
| 267 | <i>Spondylis buprestoides</i>     | Cerambycidae  | Chrysomeloidea  | Cucujiformia     | Polyphaga | Wood   | Forest | Epig  | Temp  | Wide  | Neut | Sex   | Large | Mobil | 0 | 0 | 0 |
| 268 | <i>Staphylinus erythropterus</i>  | Staphylinidae | Staphylinioidea | Staphyliniformia | Polyphaga | Pred   | Forest | Epig  | Temp  | Wide  | Neut | Sex   | Med   | Mobil | 1 | 1 | 0 |
| 269 | <i>Stenolophus teutonius</i>      | Carabidae     | Caraboidea      | Carabiformia     | Adephaga  | Pred   | Open   | Epig  | Temp  | Wide  | Neut | Sex   | Med   | Mobil | 0 | 0 | 0 |
| 270 | <i>Stenomax aeneus</i>            | Tenebrionidae | Tenebrionoidea  | Cucujiformia     | Polyphaga | Sapro  | Forest | Xylo  | Temp  | Fragm | Neut | Sex   | Med   | Seden | 1 | 1 | 0 |
| 271 | <i>Stenurella melanura</i>        | Cerambycidae  | Chrysomeloidea  | Cucujiformia     | Polyphaga | Wood   | Forest | Xylo  | Temp  | Wide  | Neut | Sex   | Med   | Mobil | 0 | 0 | 0 |
| 272 | <i>Stenurella nigra</i>           | Cerambycidae  | Chrysomeloidea  | Cucujiformia     | Polyphaga | Wood   | Forest | Xylo  | Temp  | Wide  | Neut | Sex   | Med   | Mobil | 0 | 0 | 0 |
| 273 | <i>Strangalia attenuata</i>       | Cerambycidae  | Chrysomeloidea  | Cucujiformia     | Polyphaga | Wood   | Forest | Xylo  | Temp  | Wide  | Neut | Sex   | Med   | Mobil | 0 | 0 | 0 |
| 274 | <i>Strophosoma capitatum</i>      | Curculionidae | Curculionoidea  | Cucujiformia     | Polyphaga | Phyto  | Ubiq   | Herb  | Cont  | Wide  | Neut | Sex   | Small | Seden | 1 | 1 | 1 |
| 275 | <i>Strophosoma faber</i>          | Curculionidae | Curculionoidea  | Cucujiformia     | Polyphaga | Phyto  | Open   | Herb  | Cont  | Wide  | Neut | Sex   | Small | Seden | 0 | 0 | 0 |
| 276 | <i>Strophosoma melanogrammum</i>  | Curculionidae | Curculionoidea  | Cucujiformia     | Polyphaga | Phyto  | Ubiq   | Herb  | Cont  | Wide  | Neut | Parth | Small | Seden | 1 | 0 | 1 |
| 277 | <i>Synapion ebeninum</i>          | Apionidae     | Curculionoidea  | Cucujiformia     | Polyphaga | Phyto  | Open   | Herb  | Temp  | Wide  | Neut | Sex   | Small | Mobil | 0 | 0 | 0 |
| 278 | <i>Synuchus vivalis</i>           | Carabidae     | Caraboidea      | Carabiformia     | Adephaga  | Pred   | Ubiq   | Epig  | Temp  | Wide  | Neut | Sex   | Med   | Mobil | 0 | 0 | 0 |
| 279 | <i>Tachyta nana</i>               | Carabidae     | Caraboidea      | Carabiformia     | Adephaga  | Pred   | Forest | Xylo  | Temp  | Wide  | Neut | Sex   | Small | Mobil | 0 | 0 | 0 |
| 280 | <i>Tanymecus palliatus</i>        | Curculionidae | Curculionoidea  | Cucujiformia     | Polyphaga | Phyto  | Open   | Herb  | Temp  | Wide  | Neut | Sex   | Small | Mobil | 1 | 1 | 0 |
| 281 | <i>Tenebrio molitor</i>           | Tenebrionidae | Tenebrionoidea  | Cucujiformia     | Polyphaga | Sapro  | Ubiq   | Xylo  | Temp  | Wide  | Neut | Sex   | Med   | Mobil | 0 | 0 | 0 |
| 282 | <i>Tetropium castaneum</i>        | Cerambycidae  | Chrysomeloidea  | Cucujiformia     | Polyphaga | Wood   | Forest | Xylo  | Temp  | Wide  | Neut | Sex   | Small | Mobil | 0 | 0 | 0 |
| 283 | <i>Tetropium fuscum</i>           | Cerambycidae  | Chrysomeloidea  | Cucujiformia     | Polyphaga | Wood   | Forest | Xylo  | Temp  | Wide  | Neut | Sex   | Med   | Mobil | 1 | 1 | 0 |
| 284 | <i>Thanasimus formicarius</i>     | Cleridae      | Clerioidea      | Cucujiformia     | Polyphaga | Pred   | Forest | Xylo  | Temp  | Wide  | Neut | Sex   | Med   | Mobil | 0 | 0 | 0 |
| 285 | <i>Thanatophilus sinuatus</i>     | Silphidae     | Staphylinioidea | Staphyliniformia | Polyphaga | Sapro  | Ubiq   | Necro | Temp  | Wide  | Neut | Sex   | Med   | Mobil | 0 | 0 | 0 |
| 286 | <i>Trachys minuta</i>             | Buprestidae   | Buprestoidea    | Elateriformia    | Polyphaga | Phyto  | Forest | Herb  | Temp  | Wide  | Neut | Sex   | Small | Mobil | 1 | 1 | 0 |
| 287 | <i>Trichodes apiarius</i>         | Cleridae      | Clerioidea      | Cucujiformia     | Polyphaga | Pred   | Open   | Epig  | Medit | Wide  | Warm | Sex   | Med   | Mobil | 0 | 0 | 0 |
| 288 | <i>Triplax aenea</i>              | Erotylidae    | Cucujoidea      | Cucujiformia     | Polyphaga | Myceto | Forest | Fungi | Temp  | Wide  | Neut | Sex   | Small | Mobil | 1 | 1 | 0 |
| 289 | <i>Triplax russica</i>            | Erotylidae    | Cucujoidea      | Cucujiformia     | Polyphaga | Myceto | Forest | Fungi | Temp  | Wide  | Neut | Sex   | Med   | Mobil | 0 | 0 | 0 |
| 290 | <i>Tritoma bipustulata</i>        | Erotylidae    | Cucujoidea      | Cucujiformia     | Polyphaga | Myceto | Forest | Fungi | Temp  | Wide  | Neut | Sex   | Small | Mobil | 0 | 0 | 0 |
| 291 | <i>Tropinota hirta</i>            | Scarabaeidae  | Scarabaeoidea   | Scarabaeiformia  | Polyphaga | Phyto  | Open   | Herb  | Temp  | Wide  | Warm | Sex   | Med   | Mobil | 0 | 0 | 0 |
| 292 | <i>Trypocopris vernalis</i>       | Geotrupidae   | Scarabaeoidea   | Scarabaeiformia  | Polyphaga | Sapro  | Ubiq   | Copro | Temp  | Wide  | Neut | Sex   | Large | Mobil | 0 | 0 | 0 |
| 293 | <i>Trypodendron lineatum</i>      | Curculionidae | Curculionoidea  | Cucujiformia     | Polyphaga | Myceto | Forest | Xylo  | Temp  | Wide  | Neut | Sex   | Small | Mobil | 0 | 0 | 0 |
| 294 | <i>Tytthaspis sedecimpunctata</i> | Coccinellidae | Cucujoidea      | Cucujiformia     | Polyphaga | Myceto | Open   | Herb  | Medit | Wide  | Neut | Sex   | Small | Mobil | 0 | 0 | 0 |
| 295 | <i>Uleiota planata</i>            | Silvanidae    | Staphylinioidea | Staphyliniformia | Polyphaga | Sapro  | Forest | Xylo  | Temp  | Wide  | Neut | Sex   | Med   | Mobil | 0 | 0 | 0 |
| 296 | <i>Uloma culinaris</i>            | Tenebrionidae | Tenebrionoidea  | Cucujiformia     | Polyphaga | Sapro  | Forest | Xylo  | Temp  | Wide  | Neut | Sex   | Med   | Seden | 1 | 1 | 0 |
| 297 | <i>Valgus hemipterus</i>          | Scarabaeidae  | Scarabaeoidea   | Scarabaeiformia  | Polyphaga | Wood   | Ubiq   | Herb  | Temp  | Wide  | Neut | Sex   | Med   | Mobil | 0 | 0 | 0 |

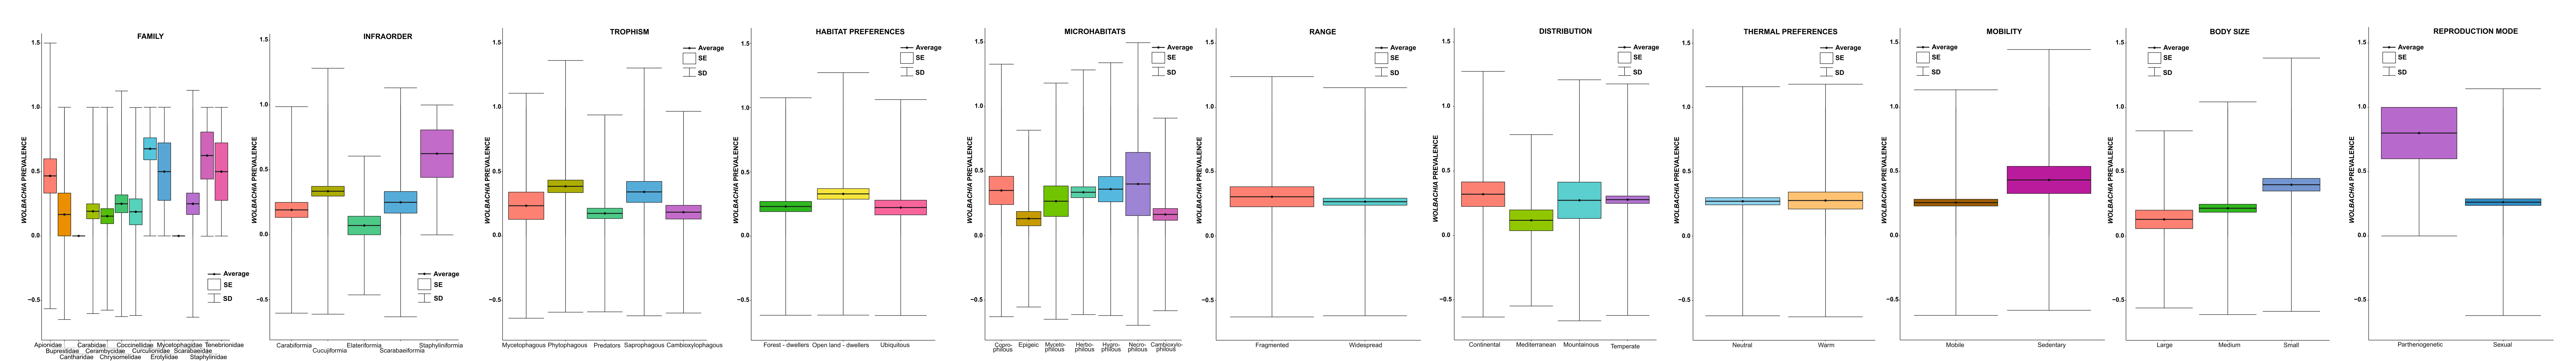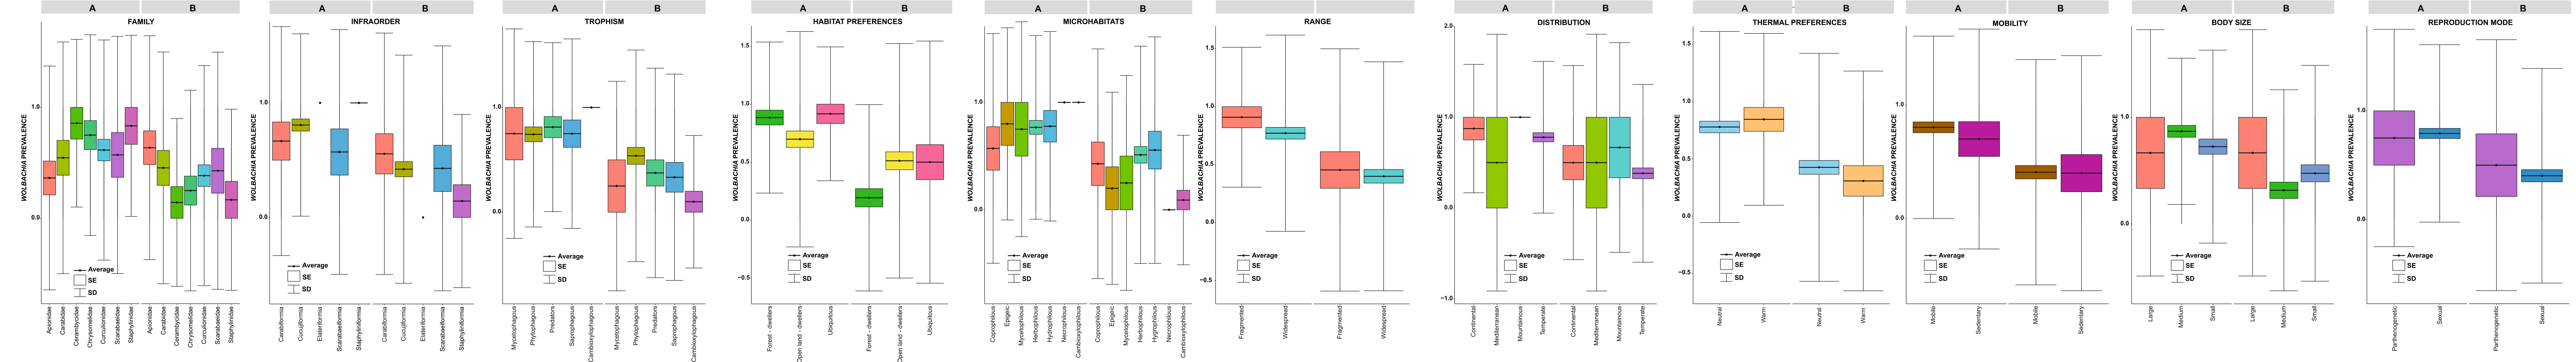

Supplementary Figure S1. Box plots illustrating differences in *Wolbachia* infection (upper panels) and prevalence of supgroups (lower panels) across taxonomic units of beetles (A) and ecological/biological traits of beetles (B).





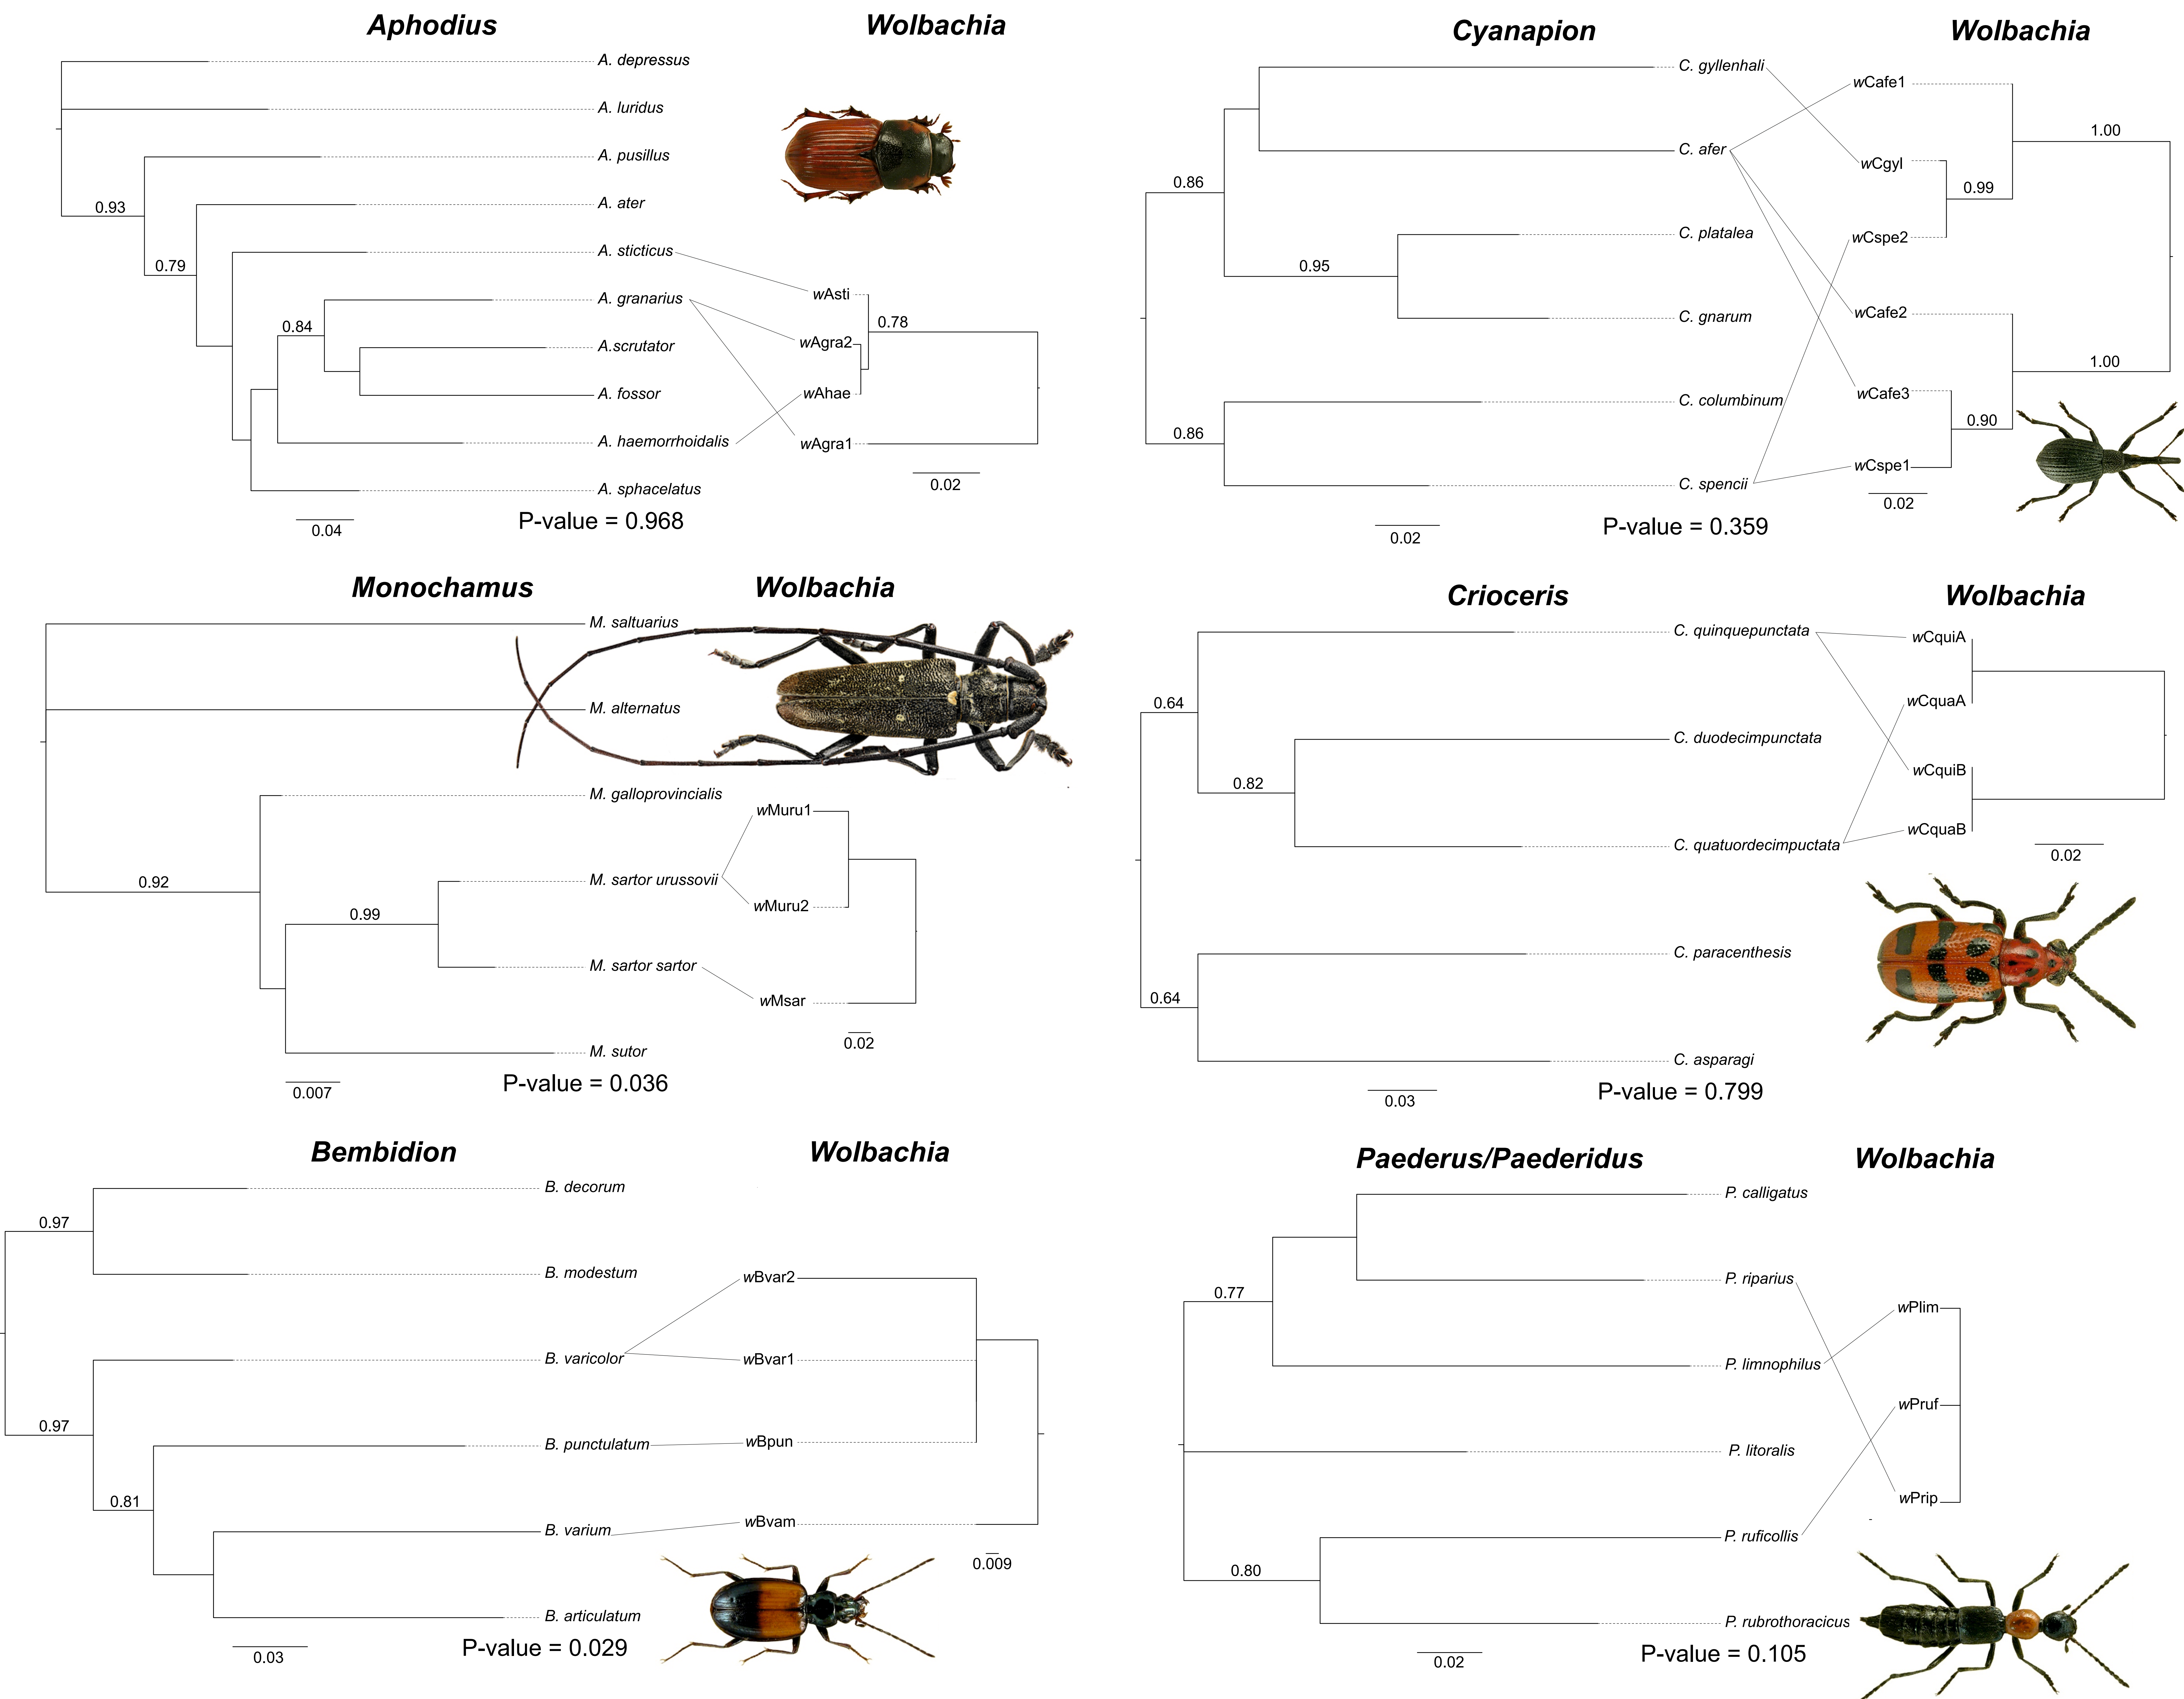

Supplementary Figure S3. Phylogenetic trees of selected groups of beetles (reconstructed on the basis of *coxI* sequences) and *Wolbachia* strains (reconstructed on the basis of selected housekeeping genes from multilocus sequence typing system) with results of cospeciation tests (performed in Procrustean Approach to Cophylogeny). Photographs are reprinted from ICONOGRAPHIA COLEOPTERORUM POLONIAE under a CC BY license, with permission (© Copyright by Prof. Lech Borowiec, Wrocław 2007–2018, Department of Biodiversity and Evolutionary Taxonomy, University of Wrocław, Poland).

Supplementary File 1. Google file (kmz) with localization of sampling sites listed in Supplementary Table 4.

Data to map ©2018 GeoBasis-DE/BKG (© 2009) Google, Inst. Geogr.National.

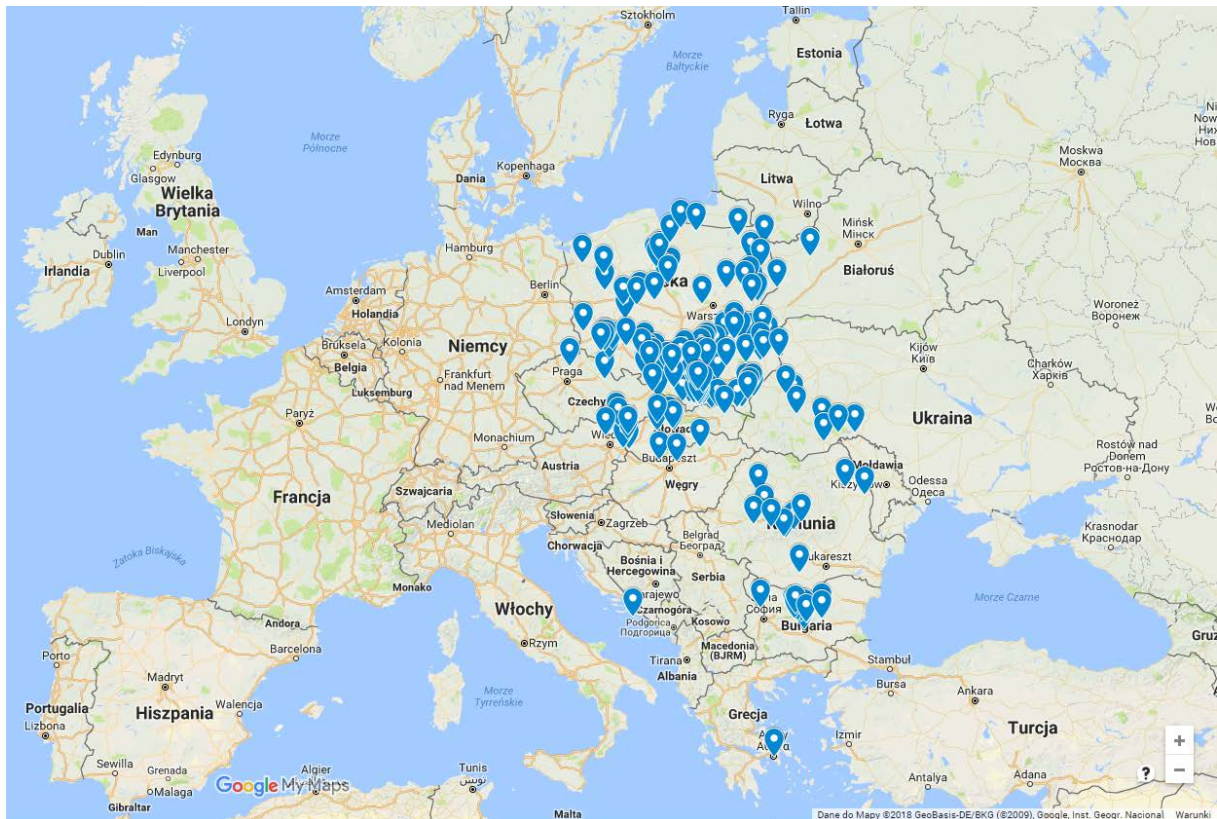

Original kmz file available under following link:

[https://drive.google.com/open?id=15yhgviGIAikY0EAKCeDbY\\_PdDlIbKMdQs&usp=sharing](https://drive.google.com/open?id=15yhgviGIAikY0EAKCeDbY_PdDlIbKMdQs&usp=sharing)

Supplementary File 2. List of references to keys and handbooks used for beetle species identification and for collection of their ecological and biological traits used for statistical analyses.

Burakowski B., Mroczkowski M., Stefańska J. *Chrząszcze Coleoptera, Biegaczowate - Carabidae, część 1. Kat. Fauny Pol., Warszawa, XXIII, 2: 1-232 (1973).*

Burakowski B., Mroczkowski M., Stefańska J. *Chrząszcze Coleoptera – Biegaczowate – Carabidae, część 2. Katalog Fauny Polski, Warszawa, XXIII, 3: 1-430 (1974).*

Burakowski B., Mroczkowski M., Stefańska J. *Chrząszcze Coleoptera – Adephaga prócz Carabidae, Myxophaga, Polyphaga: Hydrophiloidea. Katalog Fauny Polski, Warszawa, XXIII, 4: 1-307 (1976).*

Burakowski B., Mroczkowski M., Stefańska J. *Chrząszcze Coleoptera, Histeroidea i Staphylinoidea prócz Staphylinidae. Katalog Fauny Polski, PWN, Warszawa, XXIII, 5: 1-356 (1978).*

Burakowski B., Mroczkowski M., Stefańska J. *Chrząszcze Coleoptera, Kusakowate – Staphylinidae, cz. 1. Katalog Fauny Polski, PWN, Warszawa, XXIII, 6: 1-310 (1979).*

Burakowski B., Mroczkowski M., Stefańska J. *Chrząszcze Coleoptera, Kusakowate – Staphylinidae, cz. 2. Katalog Fauny Polski, PWN, Warszawa, XXIII, 7: 1-272 (1980).*

Burakowski B., Mroczkowski M., Stefańska J. *Chrząszcze Coleoptera, Kusakowate – Staphylinidae, cz. 3: Aleocharinae. Katalog Fauny Polski, PWN, Warszawa, XXIII, 8: 1-330 (1981).*

Burakowski B., Mroczkowski M., Stefańska J. *Chrząszcze Coleoptera. Scarabaeoidea, Dascilloidea, Byrrhoidea i Parnoidea. Katalog Fauny Polski, Warszawa, XXIII, 9: 1-294 (1983).*

Burakowski B., Mroczkowski M., Stefańska J. *Chrząszcze Coleoptera. Buprestoidea, Elateroidea i Cantharoidea. Katalog Fauny Polski, Warszawa, XXIII, 10: 1-401 (1985).*

Burakowski B., Mroczkowski M., Stefańska J. *Chrząszcze Coleoptera – Dermestoidea, Bostrichoidea, Cleroidea i Lymexyloidea. Katalog Fauny Polski, Warszawa, XXIII, 11: 1-243 (1986a).*

- Burakowski B., Mroczkowski M., Stefańska J. *Chrząszcze Coleoptera – Cucujoidea, część 1. Katalog Fauny Polski*, Warszawa, XXIII, **12**: 1-266 (1986b).
- Burakowski B., Mroczkowski M., Stefańska J. *Chrząszcze Coleoptera – Cucujoidea, część 3. Katalog Fauny Polski*, Warszawa, XXIII, **14**: 1-309 (1987).
- Burakowski B., Mroczkowski M., Stefańska J. 1990. Chrząszcze Coleoptera. Cerambycidae i Bruchidae. *Katalog fauny Polski*, Warszawa, XXIII, **15**: 1-312 (1990).
- Burakowski B., Mroczkowski M., Stefańska J. *Chrząszcze Coleoptera. Stonkowate – Chrysomelidae, część 2. Katalog Fauny Polski*, Warszawa, XXIII, **17**: 1-227 (1991).
- Burakowski B., Mroczkowski M., Stefańska J. *Chrząszcze – Coleoptera. Ryjkowcowate prócz ryjkowców – Curculionioidea prócz Curculionidae. Katalog Fauny Polski*, Warszawa, XXIII, **18**: 1-324 (1992).
- Burakowski B., Mroczkowski M., Stefańska J. *Chrząszcze – Coleoptera, Ryjkowce – Curculionidae część 2. Katalog Fauny Polski*. MiIZ PAN, Warszawa, XXIII, **20**: 1-310 (1995).
- Burakowski B., Mroczkowski M., Stefańska J. *Chrząszcze – Coleoptera, Ryjkowce – Curculionidae część 3. Katalog Fauny Polski*. MiIZ PAN, Warszawa, XXIII, **21**: 1-307 (1997).
- Burakowski B., Mroczkowski M., Stefańska J. *Chrząszcze Coleoptera. Uzupełnienia tomów 2-21. Katalog Fauny Polski*. MiIZ PAN, Warszawa, XXIII, **22**: 1-252 (2000).
- Koch, K., 1989a: Die Käfer Mitteleuropas. Ökologie. Band 1. Goecke & Evers, Krefeld, 440 pp (1989a).
- Koch, K., 1989b: Die Käfer Mitteleuropas. Ökologie. Band 2. Goecke & Evers, Krefeld, 382 pp (1989b).
- Koch, K., 1992: Die Käfer Mitteleuropas. Ökologie. Band 3. Goecke & Evers, Krefeld, 389 pp (1992).
- Löbl I., Smetana A. (eds.). *Catalogue of Palaearctic Coleoptera. Vol. 1. Archostemata – Myxophaga – Adephaga*. Brill, Leiden Boston, 819 pp (2003).
- Löbl I., Smetana A. (eds.). *Catalogue of Palaearctic Coleoptera. Vol. 4. Elateroidea – Derodontoidea – Bostrichoidea – Lymexyloidea – Cleroidea – Cucujoidea*. Apollo Books, Stenstrup, 935 pp (2007).

Löbl I., Smetana A. (eds.). *Catalogue of Palaearctic Coleoptera. Vol. 5. Tenebrionoidea.*  
Apollo Books, Stenstrup, 670 pp (2008).

Löbl I., Smetana A. (eds.). *Catalogue of Palaearctic Coleoptera. Vol. 6. Chrysomeloidea.*  
Apollo Books, Stenstrup, 924 pp (2010).

Löbl I., Smetana A. (eds.). *Catalogue of Palaearctic Coleoptera. Vol. 7. Curculionoidea I.*  
Apollo Books, Stenstrup, 373 pp (2011).

Löbl I., Smetana A. (eds.) *Catalogue of Palaearctic Coleoptera. Vol. 8. Curculionoidea II.*  
Leiden, Brill, 700 pp (2013).
